# Supplementary material for: Dislocated distal radial fractures in adult patients: 4 weeks versus 6 weeks of cast immobilisation following reduction, a multicentre randomised controlled trial, study protocol
Source: PubMed Central journal article supplement — BMJ Open. 2019 Mar 15;9(3):e026540. doi: 10.1136/bmjopen-2018-026540 (PMC6429892; doi:10.1136/bmjopen-2018-026540), 2019-03-15
Supplement: bmjopen-2018-026540.draft_revisions.pdf [file bmjopen-2018-026540.draft_revisions.pdf]

# BMJ Open

BMJ Open is committed to open peer review. As part of this commitment we make the peer review history of every article we publish publicly available.

When an article is published we post the peer reviewers' comments and the authors' responses online. We also post the versions of the paper that were used during peer review. These are the versions that the peer review comments apply to.

The versions of the paper that follow are the versions that were submitted during the peer review process. They are not the versions of record or the final published versions. They should not be cited or distributed as the published version of this manuscript.

BMJ Open is an open access journal and the full, final, typeset and author-corrected version of record of the manuscript is available on our site with no access controls, subscription charges or pay-per-view fees (<http://bmjopen.bmj.com>).

If you have any questions on BMJ Open's open peer review process please email [info.bmjopen@bmj.com](mailto:info.bmjopen@bmj.com)

# BMJ Open

## **Dislocated distal radial fractures in adult patients: Four weeks versus Six weeks of cast immobilisation following reduction, a multicenter randomized controlled trial.**

|                               |                                                                                                                                                                                                                                                                                                                                                                                             |
|-------------------------------|---------------------------------------------------------------------------------------------------------------------------------------------------------------------------------------------------------------------------------------------------------------------------------------------------------------------------------------------------------------------------------------------|
| Journal:                      | <i>BMJ Open</i>                                                                                                                                                                                                                                                                                                                                                                             |
| Manuscript ID                 | bmjopen-2018-026540                                                                                                                                                                                                                                                                                                                                                                         |
| Article Type:                 | Protocol                                                                                                                                                                                                                                                                                                                                                                                    |
| Date Submitted by the Author: | 22-Oct-2018                                                                                                                                                                                                                                                                                                                                                                                 |
| Complete List of Authors:     | van Delft, Eva A.K.; Amsterdam UMC, Vrije Universiteit Amsterdam, Trauma surgery<br>Bloemers, Frank; VU medisch centrum, Traumasurgery<br>Sosef, Nico L; Spaarne Gasthuis, Trauma Surgery<br>Bonjer, H.J. (Jaap); Amsterdam UMC, Vrije Universiteit Amsterdam, Surgery<br>Schep, Niels W.L.; Maasstad Ziekenhuis, Trauma Surgery<br>Vermeulen, Jeffrey; Maasstad Ziekenhuis, Trauma Surgery |
| Keywords:                     | Adult orthopaedics < ORTHOPAEDIC & TRAUMA SURGERY, Hand & wrist < ORTHOPAEDIC & TRAUMA SURGERY, Orthopaedic & trauma surgery < SURGERY                                                                                                                                                                                                                                                      |
|                               |                                                                                                                                                                                                                                                                                                                                                                                             |

SCHOLARONE™  
Manuscripts

## TITLE PAGE

**Title:** Dislocated distal radial fractures in adult patients: Four weeks versus Six weeks of cast immobilisation following reduction, a multicenter randomized controlled trial.

**Acronym:** DR PIP II study (Distal radius plaster immobilisation period)

### Authors and affiliations:

1. *E.A.K. van Delft, MD, PhD candidate, surgical resident [corresponding author]*

Affiliation: Amsterdam UMC, Vrije Universiteit Amsterdam, Department of Trauma Surgery, Amsterdam Movement Sciences

Address: Boelelaan 1117, Amsterdam, The Netherlands

Email: [evavandelft@gmail.com](mailto:evavandelft@gmail.com)

Phone: 0031-204444444

2. *F.W. Bloemers, MD, PhD, MSc, trauma surgeon*

Affiliation: Amsterdam UMC, Vrije Universiteit Amsterdam, Department of Trauma Surgery

Address: Boelelaan 1117, Amsterdam, The Netherlands

Email: [fw.bloemers@vumc.nl](mailto:fw.bloemers@vumc.nl)

3. *N.L. Sosef, MD, trauma surgeon*

Affiliation: Spaarne Gasthuis Hospital, Department of Surgery

Address: Boerhaavelaan 22, 2035 RC, Haarlem, The Netherlands

Email: [nsosef@spaarnegasthuis.nl](mailto:nsosef@spaarnegasthuis.nl)

4. *Prof. H.J. Bonjer, MD, PhD, Professor of Surgery*

Affiliation: Amsterdam UMC, Vrije Universiteit Amsterdam, Department of Surgery

Address: Boelelaan 1117, Amsterdam, The Netherlands

Email: [j.bonjer@vumc.nl](mailto:j.bonjer@vumc.nl)

5. *N.W.L. Schep, MD, PhD, MSc, trauma surgeon*

Affiliation: Maasstad Hospital, Department of Trauma and hand surgery

Address: Maasstadweg 21, 3079 DZ, Rotterdam, The Netherlands

Email: [schepn@maasstadziekenhuis.nl](mailto:schepn@maasstadziekenhuis.nl)

6. *J. Vermeulen, MD, PhD, MSc, trauma surgeon*

Affiliation: Maasstad Hospital, Department of Trauma surgery

Address: Maasstadweg 21, 3079 DZ, Rotterdam, The Netherlands

Email: [vermeulenj@maasstadziekenhuis.nl](mailto:vermeulenj@maasstadziekenhuis.nl)

**Trial registration:** Netherlands National Trial Register: NTR 6600, ABR: NL62861.029.17  
Medical Ethical Committee VUmc registration number: 2018.004

**Protocol version:** 2

1  
2  
3 **Funding:** no funding was obtained for this study  
4 **Responsibilities:** Project leader: F.W. Bloemers  
5 **Word count:** 2023  
6  
7

8 **Dislocated distal radial fractures in adult patients:**  
9  
10 **Four weeks versus Six weeks of cast immobilisation following reduction,**  
11 **a multicenter randomized controlled trial.**  
12  
13

14  
15 **ABSTRACT**  
16

17 **Introduction:** Up to 30% of patients with a dislocated distal radius fracture treated with closed  
18 reduction and cast immobilisation suffer from long-term functional restrictions. It remains  
19 unclear, whether duration of cast immobilisation influences functional outcome. The aim of this  
20 study is to evaluate whether the functional outcome of dislocated distal radial fractures could be  
21 improved by shortening the period of immobilisation.  
22  
23  
24  
25

26 **Methods and analysis:** A single blinded multicenter randomized controlled trial is initiated.  
27 Four weeks of plaster cast immobilisation is compared to six week plaster cast immobilisation in  
28 adult patient with adequately reduced distal radial fractures.  
29

30 Primary outcome parameters are functional outcome measured with the Patient Related Wrist  
31 Evaluation after 1 year of follow up. Secondary outcomes are: Disability of Arm, Shoulder and  
32 Hand Score after one year, SF-36 after one year, functional outcome earlier in follow up (6  
33 weeks, 12 weeks and 6 months), range of motion, pain level and complications (number of re-  
34 interventions, secondary displacement, non-/malunion).  
35  
36  
37  
38  
39  
40

41 **Ethics and dissemination:** The expectation of this study is that a shorter duration of plaster  
42 cast immobilisation is beneficial. This risk of specific complications is low and generally similar in  
43 both treatment options. Follow-up is standardized according to current trauma guidelines.  
44 Present literature indicates that both treatment options that are used within this study are  
45 accepted protocols for treatment of displaced distal radius fractures. This trial will provide level-1  
46 evidence for the comparison of functional outcome between the two treatment options for  
47 dislocated distal radial fractures.  
48  
49  
50  
51  
52

53 **Trial registration:** Netherlands National Trial Register: NTR 6600, ABR: NL62861.029.17  
54 Medical Ethical Committee VUmc registration number: 2018.004  
55  
56  
57

1  
2  
3  
4  
5  
6  
7  
8  
9  
10  
11  
12  
13  
14  
15  
16  
17  
18  
19  
20  
21  
22  
23  
24  
25  
26  
27  
28  
29  
30  
31  
32  
33  
34  
35  
36  
37  
38  
39  
40  
41  
42  
43  
44  
45  
46  
47  
48  
49  
50  
51  
52  
53  
54  
55  
56  
57  
58  
59  
60

**Keywords:** Distal radial fractures, conservative treatment, immobilisation period

For peer review only

1  
2  
3 **Strengths and limitations:**  
4

- 5 • Single blinded study
- 6 • Multicenter study
- 7
- 8 • This studies uses validated outcomes (PRWE, QuickDASH, SF-36)
- 9
- 10 • This studies uses both statistical as well as minimal clinical important difference
- 11 • This trial will provide level-1 evidence for the period of immobilisation in reduced distal
- 12 radial fractures.
- 13
- 14
- 15
- 16
- 17
- 18
- 19
- 20
- 21
- 22
- 23
- 24
- 25
- 26
- 27
- 28
- 29
- 30
- 31
- 32
- 33
- 34
- 35
- 36
- 37
- 38
- 39
- 40
- 41
- 42
- 43
- 44
- 45
- 46
- 47
- 48
- 49
- 50
- 51
- 52
- 53
- 54
- 55
- 56
- 57
- 58
- 59
- 60

For peer review only

## INTRODUCTION

Distal radial fractures (DRF) are common fractures and account for up to 20% of all extremity fractures.[1] Most of these patients can be treated non-operatively in a plaster, with excellent functional results.[2,3] Nevertheless, up to 30% of patients with a dislocated DRF suffer from long-term functional restrictions following conservative treatment.[4]

Unstable DRF are liable to displace within the first two weeks, only 7-8% displace after this time and none after six weeks.[5-7] Therefore a period of up to six weeks of immobilisation is advised, although, this is still a matter of debate in literature.[8,9]

Two prospective studies of patients with displaced and reduced DRF showed that a shorter immobilisation period was safe, without increased numbers of (re)dislocation of the fracture. Besides, the outcome seemed to be better on the long term, in terms of wrist motion and grip strength.[8,10] Unfortunately these studies were non-randomized and conducted in heterogeneous groups of patients suffering both non-dislocated and dislocated fractures. Obviously, the ultimate treatment of reduced DRF is short, safe and leads to an early return of function. To assess whether reduction of the immobilisation period with two weeks will lead to better functional outcome, a multicenter randomized controlled trial is conducted.

The patient reported functional outcome after one year will be assessed using validated instruments: The Patient Rated Wrist Evaluation (PRWE), the Quick Disability of Arm and Shoulder (DASH) and SF-36 forms.[11-13] Other outcome measures are the functional outcome earlier in follow up, the amount of pain (VAS), number of secondary dislocations, number of re-interventions, range of motion, non-/malunion and complex regional pain syndrome (CRPS).

The aim of this trial is to compare the results of four weeks of cast immobilisation with six weeks of cast immobilisation in closed and adequately reduced DRF. Usually an immobilisation period of five or six weeks is preferred as non-operative treatment of closed and adequately reduced DRF. Despite the minimal evidence in literature this immobilisation period can be questioned. A randomized clinical trial with sufficient power is needed to provide scientific support for a preferred treatment strategy for reduced DRF.

1  
2  
3  
4  
5  
6  
7  
8  
9  
10  
11  
12  
13  
14  
15  
16  
17  
18  
19  
20  
21  
22  
23  
24  
25  
26  
27  
28  
29  
30  
31  
32  
33  
34  
35  
36  
37  
38  
39  
40  
41  
42  
43  
44  
45  
46  
47  
48  
49  
50  
51  
52  
53  
54  
55  
56  
57  
58  
59  
60

For peer review only



## METHODS AND ANALYSIS

This study will be conducted as a prospective single blinded multicenter randomized clinical trial in two large teaching hospitals. In this study four weeks of plaster immobilisation is compared with six weeks of plaster immobilisation.[Figure 1 and 2] Patients will be treated in a lower arm cast in neutral position.[14] Following immobilisation treatment will be the same for both groups, in which additional physiotherapy is advised and exercises to train wrist function will be given. The Medical Ethics Committee has approved the study protocol.

### Patient and Public involvement

Evaluation of eligible patients will take place either at the emergency department or at the outpatient department. They will receive written information and a consent form from the attending physician, the clinical investigator or a research assistant. Patients are eligible if they follow the in- and exclusion criteria:

#### Inclusion criteria:

1. Age > 18 years;
2. Primary displaced unilateral DRF;
3. Independent for activities of daily living.

#### Exclusion criteria:

1. Fracture of the contralateral wrist;
2. Ipsilateral fractures proximal of the DRF;
3. Pre-existent abnormalities or functional deficits of the fractured wrist;
4. Open fractures.
5. Language ability to understand the Dutch patient information and questionnaires.

Patients can participate only if closed reduction of the distal radial fracture is adequately. The indication for reduction will be set, using the Lidström criteria for misalignment.[15] Patients can only participate in this study if reduction is performed successfully. Successful reduction will be classified as: radial shortening <3mm, dorsal tilt <10° or intra-articular step-off <2mm, according the guidelines of the American Association of Orthopedic Surgeons.[16]

After providing informed consent, eligible patients will be randomized after two weeks when the fracture has proven to be stable. An independent research assistant will perform concealed

permutated block randomisation using a computer-generated randomisation schedule after stratification for fracture type, gender and age. Allocation will be at random in four blocks. To prevent bias, stratification by age (younger and older than 60 years) and gender will be performed.[table 1]

**Table 1:** *Stratification by gender and age (younger and older than 60 years)*

| Stratification by gender and age |        |            |                          |
|----------------------------------|--------|------------|--------------------------|
| Patient characteristics          |        |            | Randomization            |
| List 1                           | Male   | <60 y.o.a. | ABAB AABB ABBA BABA BAAB |
| List 2                           | Male   | >60 y.o.a. | BAAB BBAA ABAB AABB ABBA |
| List 3                           | Female | <60 y.o.a. | AABB ABBA BAAB BBAA BABA |
| List 4                           | Female | >60 y.o.a. | ABBA BABA ABAB AABB AABB |

*A = four weeks, B = six weeks*

Randomisation between another 2 or 4 weeks cast immobilisation will be performed to complete a total of 4 and 6 weeks of cast immobilisation, respectively. Randomisation will occur after informed consent.

The primary outcome measure of this study is PRWE after one year.[11] The secondary outcome measures are The QuickDASH score after one year[12]; The SF-36 Healthy Survey after one year[13]; Functional outcome after 8 weeks, 3 months and 6 months; Range of motion; Pain level after 8 weeks, 3 months, 6 months and 1 year; Lidström-score[15]; and fracture related complications as secondary dislocation after cast removal, number of re-interventions, delayed and non-unions and CRPS.

PRWE score is the most responsive instrument for evaluating the outcome in patients with DRF. The PRWE is a validated 15-item (scored 1-10), self-reported questionnaire designed to help describe the disability experienced by people with disorders of the wrist and also to monitor changes in symptoms and function over time. Scores will be transformed to a 0-100 score.[11] A higher score indicates greater disability.

The DASH Outcome Measure is a validated 30-item, self-reported questionnaire designed to help describe the disability experienced by people with upper-limb disorders and also to monitor changes in symptoms and function over time.[16] The QuickDASH is a shortened version of the DASH Outcome Measure. Instead of 30 items, the QuickDASH uses 11 items (scored 1–5) to

1  
2  
3 measure physical function and symptoms in people with any or multiple musculoskeletal  
4 disorders of the upper limb. At least 10 of the 11 items must be completed for a score to be  
5 calculated. The scores will be transformed to a 0–100 scale for easy comparison. A higher  
6 score indicates greater disability.[12]

7  
8  
9 The SF-36 is a validated 36-item, self-reported questionnaire designed to describe the quality of  
10 life. The score consists eight subgroups: vitality, mental health social role, emotional role,  
11 physical role, general health, bodily pain, physical functioning. The subgroups are transformed  
12 to a 0-100 scale. The lower the score the more disability, an higher score indicates less  
13 disability.[13]

14  
15  
16  
17  
18  
19 After inclusion, all patients will be followed for one year in total. Clinical assessments will occur  
20 at the time of admission (ED), one week (3-10-day window), two weeks (11-18-day window),  
21 four weeks (24-32-day window) or six weeks (5-7-week window), three months (11-15-week  
22 window), six months (5-7-month window), and 12 months (11-14-month window) after inclusion.

23  
24  
25  
26 At each follow up (FU) visit, the research coordinator or research assistant will ascertain patient  
27 status (i.e., secondary interventions, adverse events/complications, deaths) and will verify  
28 information within medical records. All adverse events will be addressed to the principal  
29 investigator.

30  
31  
32  
33 At each FU visit, the patients will be asked to indicate the actual pain level on a VAS. Patients  
34 will also be asked if they have any complaints of their treatment and will be asked if they are  
35 currently treated by a physical therapist. At each visit from eight weeks onwards, the range of  
36 motion of the wrist will be measured using a goniometer. In addition, patients will be asked to  
37 complete the questionnaires relating to disability (QuickDASH score, PRWE, SF-36).

38  
39  
40  
41  
42 Plain X-rays of the wrist will be made at the time of presentation in the hospital (ED), after one  
43 and two weeks, 4 or 6 weeks and at the follow-up visit after eight weeks, three months, six  
44 months and one year. The X-ray at one year will be taken in order to determine the grade of  
45 degenerative joint changes. Time to define the presence of a delayed- or malunion will be at  
46 three or six months.[figure 1-3]

47  
48  
49  
50  
51  
52 The primary outcome will be the Patient Related Wrist Evaluation Score, of which the minimal  
53 clinically important difference is 11.5 points. The standard deviation of the PRWE is 14.0.[17]  
54 Based on a difference of 11.5 points, the sample size of 27 patients per treatment group was  
55

1  
2  
3 calculated with a power (1-β) of 80 percent and a type I error (α) of 5 percent, allowing for 10  
4 percent drop-out. In this study, we decided to include 45 patients per treatment group. To allow  
5 a 10 percent drop-out in this study, in total 100 patients will be included.  
6  
7

8  
9 Data from the demographic data collection and the outcome parameters will be cleaned blindly  
10 from the treatment data. Data are presented as mean scores with 95% confidence intervals.  
11 The analysis of this study will be carried out according to the intention-to treat principle, i.e. the  
12 patients will remain in the group they will be randomly allocated to at baseline. Analysis of  
13 functional outcome will be assessed using repeated-measures analysis of variance (GLM 4)  
14 with the time as the within-group factor and the treatment as the between-group factor. Post-  
15 hoc analysis will be performed on the time of randomisation. Group comparisons at the different  
16 time points will be made only when the overall repeated-measures tests are statistically  
17 significant. All scores will be tested for normality using the Kolmogorov-Smirnov test. Parametric  
18 variables will be compared using the Student's t-test, while non-parametric and ordinal variables  
19 will be compared using the Mann-Whitney U statistic. Nominal variables will be compared  
20 across independent groups using the chi-squared test or Fisher's exact test. Homogeneity of  
21 variance will be assessed using Levene's test. Also, a multiple regression will be performed.  
22 SPSS statistical software (version 24.0) will be used for the analysis, in which two-tailed P value  
23 < 0.05 will be considered significant.  
24  
25  
26  
27  
28  
29  
30  
31  
32  
33  
34  
35  
36  
37  
38  
39  
40  
41  
42  
43  
44  
45  
46  
47  
48  
49  
50  
51  
52  
53  
54  
55  
56  
57  
58  
59  
60

## ETHICS AND DISSEMINATION

Present literature indicates that four weeks of immobilisation as well as six weeks of immobilisation are both accepted protocols for treatment of displaced DRF. In daily practise, a six weeks immobilisation period is mostly used. To assess the clinical controversy on this duration of treatment, this study was initiated.

The studies done for assessing the immobilisation periods of DRF have their limitations of using non-validated outcome score lists, which makes it impossible to conclude with certainty shorter immobilisation periods of DRF are preferred.

The expectation of this study is that a shorter duration of plaster cast immobilisation is beneficial for the patients. This risk of specific complications is low and generally similar in both treatment options.

The Medical Ethical Committee VUmc has approved the study protocol (2018.004).

This trial will provide level-1 evidence for the comparison of functional outcome between the two treatment options for dislocated DRF.

## REFERENCES

1. **Meena S, Sharma P, Sambharia AK, Dawar A**, Fracture of Distal Radius: An overview. *J Family Medicine and Primary Care*, 2014; 3(4): 325-332.
2. **Cooney WP**, Management of Colles' fractures. *J Hand Surg Br*, 1989;14(2): 137-139.
3. **McQueen M, Caspers J**, Colles fracture: does the anatomical result affect the final function? *J Bone Joint Surg*, 1988; 70(4): 649-651.
4. **Cooney WP, James M.D, Dobyys J.H, Linscheid R.L.**, Complications of Colles fractures. *J Bone Joint Surg Am*, 1980; 62(4): 613-619.
5. **Solgaard S**, Early displacement of distal radius fracture. *Acta Orthopædica Scandinavia*, 1986; 57(3): 229-231.
6. **Abbaszadegan H, Sivers KV, Jonsson U**, Late displacement of Colles'fractures. *Int Orthopedics*, 1988; 12(3): 197-199.
7. **Solgaard S**, Function after distal radius fracture. *Acta Orthop Scand*, 1988; 59(1): 39-42.
8. **McAuliffe TB, Hilliar KM, Coates CJ, Grange WJ**, Early mobilisation of Colles' fractures. *J Bone Joint Surg Br*, 1987; 69(5) :727-729.
9. **Christensen OM, Christiansen TG, Krasheninnikhoff M, Hanssen FF**, Length of immobilization after fractures of the distal radius. *Int Orthop*, 1995;19(1): 26-9.
10. **Vang Hansen F, Staunstrup H, Mikkelsen S**, A comparison of 3 and 5 weeks immobilisation for Older type 1 and 2 Colles' fractures. *J Hand Surg Br*, 1998; 23(3): 400-401.
11. **MacDermid JC, Turgeon T, Richards RS, Beadle M, Roth JH**, Patient rating of wrist pain and disability: a reliable and valid measurement tool. *J Orthop Trauma*, 1998; 12(8): 577-586.
12. **Gummesson C, Ward MM, Atroshi I**, The shortened disabilities of the arm, shoulder and hand questionnaire (QuickDASH): validity and reliability based on responses within the full-length DASH. *BMC Musculoskelet Disord*, 2006; 7-44.
13. **Aaronson NK, Muller M, Cohen PD, Essink-Bot ML, Fekkes M, Sanderman R, Sprangers MA, te Velde A, Verrips E**, Translation, validation, and norming of the Dutch language version of the SF-36 Health Survey in community and chronic disease, *J Clin Epidemiol*, 1998; 51(11): 1055-1068.
14. **Handol HHG, Madhok R**, Conservative interventions for treating distal radial fractures in adults. *Cochrane Database of Systematic Reviews*, 2003; (2):CD000314
15. **Lidström A**, Fractures of the distal end of the radius: a clinical and statistical study of end results. *Acta Orthop Scand Suppl*, 195; 41:1-118.
16. **AAOS**, The treatment of distal radius fractures, guideline and evidence report, December 5, 2009.
17. **Walenkamp MM, de Muinck Keizer RJ, Goslings JC, Vos LM, Rosenwasser MP, Schep MW**, The minimum clinically important Difference of the Patient-rated Wrist EvaluationScore for Patients with distal radius fractures, *Clin Orthop Relat Res*. 2015 473(10):3235-41
18. **World medical association declaration of Helsinki**: ethical principles for medical research involving human subjects. *J Postgrad Med* 2002, 48:206-208.

1  
2  
3  
4  
5  
6  
7  
8  
9  
10  
11  
12  
13  
14  
15  
16  
17  
18  
19  
20  
21  
22  
23  
24  
25  
26  
27  
28  
29  
30  
31  
32  
33  
34  
35  
36  
37  
38  
39  
40  
41  
42  
43  
44  
45  
46  
47  
48  
49  
50  
51  
52  
53  
54  
55  
56  
57  
58  
59  
60

For peer review only

## AUTHORS CONTRIBUTIONS

|                           |                                                                                                              |
|---------------------------|--------------------------------------------------------------------------------------------------------------|
| <u>E.A.K. van Delft:</u>  | Study development, writing study protocol,<br>Clinical investigator in Amsterdam UMC, VU Medical Center      |
| <u>F.W. Bloemers:</u>     | Project leader, corrections of study protocol                                                                |
| <u>N.L. Sosef:</u>        | First clinical investigator in Spaarne Gasthuis                                                              |
| <u>Prof. H.J. Bonjer:</u> | Head of department of Surgery Amsterdam UMC, VU Medical Center<br>Approval of the study protocol             |
| <u>N.W.L. Schep:</u>      | Study development                                                                                            |
| <u>J. Vermeulen:</u>      | Initial first clinical investigator in Spaarne Gasthuis,<br>study development, Corrections of study protocol |

## LIST OF ABBREVIATIONS

|           |                                                                                                                                                                                                      |
|-----------|------------------------------------------------------------------------------------------------------------------------------------------------------------------------------------------------------|
| AAOS      | American Association of Orthopedic Surgeons                                                                                                                                                          |
| ABR       | ABR form, General Assessment and Registration form, is the application form that is required for submission to the accredited Ethics Committee (In Dutch, ABR = Algemene Beoordeling en Registratie) |
| AVG       | Algemene verordening gegevensbescherming (Dutch Data Protection Act)                                                                                                                                 |
| CRPS      | Complex regional pain syndrome                                                                                                                                                                       |
| DASH      | Disability of Arm, Shoulder and Hand                                                                                                                                                                 |
| ED        | Emergency Department                                                                                                                                                                                 |
| IC        | Informed Consent                                                                                                                                                                                     |
| METC      | Medical research ethics committee (MREC)                                                                                                                                                             |
| NTR       | Nederlands Trial Register                                                                                                                                                                            |
| PRWE      | Patient Related Wrist Evaluation                                                                                                                                                                     |
| qDASH     | Quick Disability of Arm, Shoulder and Hand                                                                                                                                                           |
| QuickDASH | Quick Disability of Arm, Shoulder and Hand                                                                                                                                                           |
| SPSS      | Statistical Package for the Social Sciences                                                                                                                                                          |
| VAS       | Visual analog scale                                                                                                                                                                                  |
| VUmc      | Vrije Universiteit Medical Center Amsterdam                                                                                                                                                          |
| X-ray     | Radiography                                                                                                                                                                                          |

## FIGURE LEGENDS

|          |                                                                       |
|----------|-----------------------------------------------------------------------|
| Figure 1 | Inclusion procedure                                                   |
| Figure 2 | Control of alignment and randomization procedure                      |
| Figure 3 | Follow-up scheme four versus six weeks of plaster cast immobilization |



**Ethics approval and consent to participate:**

The study is submitted to the Medical Ethics Committee VU Medical Center Amsterdam and Regional Ethical Committee and will be carried out in compliance with the Declaration of Helsinki on Ethical principles for medical research involving human subjects. [18] The Medical Ethics Committee VU Medical Center Amsterdam acts as central ethics committee for this trial (reference number: NL62861.029.17)

**Consent for publication:**

All patients will provide informed consent before participation in the trial. The data will be coded by patient number. Research data will be stored in a database (IBM SPSS Statistics for Windows, Version 22.0. Armonk, NY: IBM Corp. Released 2013), and will be handled confidentially and anonymously.

**Availability of data and materials:**

The data will be coded by patient number. Research data will be stored in a database (IBM SPSS Statistics for Windows, Version 22.0. Armonk, NY: IBM Corp. Released 2013), and will be handled confidentially and anonymously. Research data that can be traced to individual persons can only be viewed by authorized personnel. These persons are the members of the research team, members of the health care inspection, and members of the Medical Ethics Committee of the Amsterdam UMC, VU Medical Center Amsterdam. Review of the data may be necessary to ensure the reliability and quality of the research. The handling of personal data is in compliance with the Data Protection Act (in Dutch: Algemene verordening gegevensbescherming, AVG) and the privacy regulation of the Amsterdam UMC, VU Medical Center Amsterdam.

**Competing interests:**

The authors declare that they have no competing interests.

**Funding:**

No external funding was received for this study.

**Authors' contributions:**

All authors participated in the design and the drafting of the manuscript. All authors have read and approved the final manuscript.

1  
2  
3 **Acknowledgements:**

4 Not applicable.  
5  
6  
7  
8  
9  
10  
11  
12  
13  
14  
15  
16  
17  
18  
19  
20  
21  
22  
23  
24  
25  
26  
27  
28  
29  
30  
31  
32  
33  
34  
35  
36  
37  
38  
39  
40  
41  
42  
43  
44  
45  
46  
47  
48  
49  
50  
51  
52  
53  
54  
55  
56  
57  
58  
59  
60

For peer review only

1  
2  
3  
4  
5  
6  
7  
8  
9  
10  
11  
12  
13  
14  
15  
16  
17  
18  
19  
20  
21  
22  
23  
24  
25  
26  
27  
28  
29  
30  
31  
32  
33  
34  
35  
36  
37  
38  
39  
40  
41  
42  
43  
44  
45  
46  
47  
48  
49  
50  
51  
52  
53  
54  
55  
56  
57  
58  
59  
60

**Figure 1:** *Inclusion procedure*

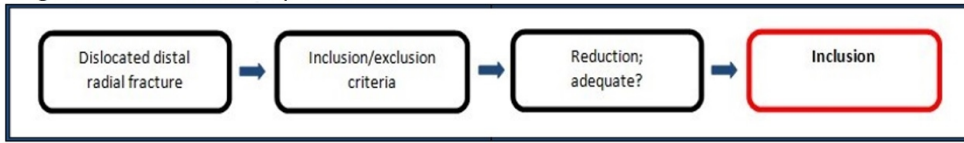

**Figure 2:** *Control of alignment and randomization procedure*

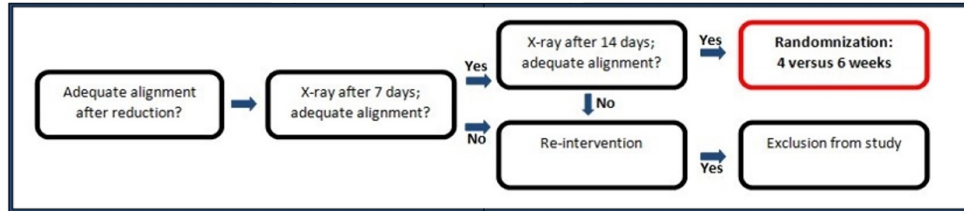

Figure 1 Inclusion procedure  
Figure 2 Control of alignment and randomization procedure

226x104mm (144 x 144 DPI)

**Figure 3:** follow-up scheme four versus six weeks plaster cast immobilization

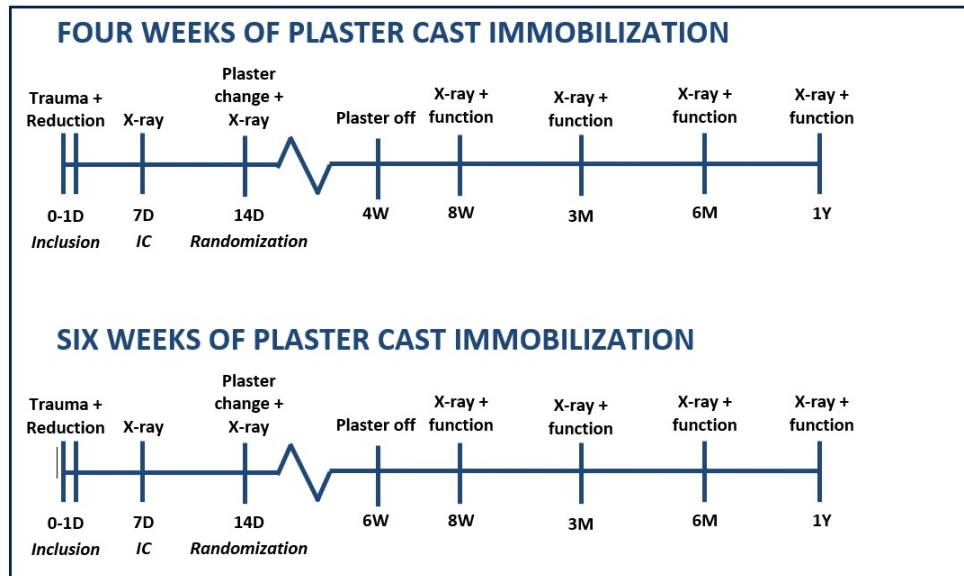

IC: informed consent. X-ray: control X-ray according to standard guidelines, assessment using Lidström score. Function: functional assessment using PRWE, QuickDASH, SF-36, range of motion, VAS scale

Figure 3 Follow-up scheme four versus six weeks of plaster cast immobilization

196x132mm (144 x 144 DPI)

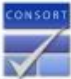

CONSORT 2010 checklist of information to include when reporting a randomised trial\*

| Section/Topic                    | Item No | Checklist item                                                                                                                                                                              | Reported on page No |
|----------------------------------|---------|---------------------------------------------------------------------------------------------------------------------------------------------------------------------------------------------|---------------------|
| <b>Title and abstract</b>        |         |                                                                                                                                                                                             |                     |
|                                  | 1a      | Identification as a randomised trial in the title                                                                                                                                           | 1                   |
|                                  | 1b      | Structured summary of trial design, methods, results, and conclusions (for specific guidance see CONSORT for abstracts)                                                                     | 1                   |
| <b>Introduction</b>              |         |                                                                                                                                                                                             |                     |
| Background and objectives        | 2a      | Scientific background and explanation of rationale                                                                                                                                          | 3                   |
|                                  | 2b      | Specific objectives or hypotheses                                                                                                                                                           | 3                   |
| <b>Methods</b>                   |         |                                                                                                                                                                                             |                     |
| Trial design                     | 3a      | Description of trial design (such as parallel, factorial) including allocation ratio                                                                                                        | 4                   |
|                                  | 3b      | Important changes to methods after trial commencement (such as eligibility criteria), with reasons                                                                                          | n.a.                |
| Participants                     | 4a      | Eligibility criteria for participants                                                                                                                                                       | 4                   |
|                                  | 4b      | Settings and locations where the data were collected                                                                                                                                        | 4/5                 |
| Interventions                    | 5       | The interventions for each group with sufficient details to allow replication, including how and when they were actually administered                                                       | 4-7                 |
| Outcomes                         | 6a      | Completely defined pre-specified primary and secondary outcome measures, including how and when they were assessed                                                                          | 5                   |
|                                  | 6b      | Any changes to trial outcomes after the trial commenced, with reasons                                                                                                                       | n.a.                |
| Sample size                      | 7a      | How sample size was determined                                                                                                                                                              | 7                   |
|                                  | 7b      | When applicable, explanation of any interim analyses and stopping guidelines                                                                                                                | n.a.                |
| <b>Randomisation:</b>            |         |                                                                                                                                                                                             |                     |
| Sequence generation              | 8a      | Method used to generate the random allocation sequence                                                                                                                                      | 5                   |
|                                  | 8b      | Type of randomisation; details of any restriction (such as blocking and block size)                                                                                                         | 5                   |
| Allocation concealment mechanism | 9       | Mechanism used to implement the random allocation sequence (such as sequentially numbered containers), describing any steps taken to conceal the sequence until interventions were assigned | 5                   |
| Implementation                   | 10      | Who generated the random allocation sequence, who enrolled participants, and who assigned participants to interventions                                                                     | 5.6                 |
| Blinding                         | 11a     | If done, who was blinded after assignment to interventions (for example, participants, care providers, those                                                                                | 6                   |

|                                                      |     |                                                                                                                                                   |                   |
|------------------------------------------------------|-----|---------------------------------------------------------------------------------------------------------------------------------------------------|-------------------|
|                                                      |     | assessing outcomes) and how                                                                                                                       |                   |
|                                                      | 11b | If relevant, description of the similarity of interventions                                                                                       | n.a.              |
| Statistical methods                                  | 12a | Statistical methods used to compare groups for primary and secondary outcomes                                                                     | 7,8               |
|                                                      | 12b | Methods for additional analyses, such as subgroup analyses and adjusted analyses                                                                  | 8                 |
| <b>Results</b>                                       |     |                                                                                                                                                   |                   |
| Participant flow (a diagram is strongly recommended) | 13a | For each group, the numbers of participants who were randomly assigned, received intended treatment, and were analysed for the primary outcome    | 7                 |
|                                                      | 13b | For each group, losses and exclusions after randomisation, together with reasons                                                                  | 7,8               |
| Recruitment                                          | 14a | Dates defining the periods of recruitment and follow-up                                                                                           | 6                 |
|                                                      | 14b | Why the trial ended or was stopped                                                                                                                | n.a.              |
| Baseline data                                        | 15  | A table showing baseline demographic and clinical characteristics for each group                                                                  | study             |
| Numbers analysed                                     | 16  | For each group, number of participants (denominator) included in each analysis and whether the analysis was by original assigned groups           | protocol<br>n.a.  |
| Outcomes and estimation                              | 17a | For each primary and secondary outcome, results for each group, and the estimated effect size and its precision (such as 95% confidence interval) | study<br>protocol |
|                                                      | 17b | For binary outcomes, presentation of both absolute and relative effect sizes is recommended                                                       | n.a.              |
| Ancillary analyses                                   | 18  | Results of any other analyses performed, including subgroup analyses and adjusted analyses, distinguishing pre-specified from exploratory         | study<br>protocol |
| Harms                                                | 19  | All important harms or unintended effects in each group (for specific guidance see CONSORT for harms)                                             | n.a.              |
| <b>Discussion</b>                                    |     |                                                                                                                                                   |                   |
| Limitations                                          | 20  | Trial limitations, addressing sources of potential bias, imprecision, and, if relevant, multiplicity of analyses                                  | study<br>protocol |
| Generalisability                                     | 21  | Generalisability (external validity, applicability) of the trial findings                                                                         |                   |
| Interpretation                                       | 22  | Interpretation consistent with results, balancing benefits and harms, and considering other relevant evidence                                     |                   |
| <b>Other information</b>                             |     |                                                                                                                                                   |                   |
| Registration                                         | 23  | Registration number and name of trial registry                                                                                                    | 1                 |
| Protocol                                             | 24  | Where the full trial protocol can be accessed, if available                                                                                       | 1                 |
| Funding                                              | 25  | Sources of funding and other support (such as supply of drugs), role of funders                                                                   | 12                |

\*We strongly recommend reading this statement in conjunction with the CONSORT 2010 Explanation and Elaboration for important clarifications on all the items. If relevant, we also recommend reading CONSORT extensions for cluster randomised trials, non-inferiority and equivalence trials, non-pharmacological treatments, herbal interventions, and pragmatic trials. Additional extensions are forthcoming: for those and for up to date references relevant to this checklist, see [www.consort-statement.org](http://www.consort-statement.org).



# BMJ Open

## Dislocated distal radial fractures in adult patients: Four weeks versus Six weeks of cast immobilisation following reduction, a multicenter randomized controlled trial, study protocol

|                                 |                                                                                                                                                                                                                                                                                                                                                                                             |
|---------------------------------|---------------------------------------------------------------------------------------------------------------------------------------------------------------------------------------------------------------------------------------------------------------------------------------------------------------------------------------------------------------------------------------------|
| Journal:                        | <i>BMJ Open</i>                                                                                                                                                                                                                                                                                                                                                                             |
| Manuscript ID                   | bmjopen-2018-026540.R1                                                                                                                                                                                                                                                                                                                                                                      |
| Article Type:                   | Protocol                                                                                                                                                                                                                                                                                                                                                                                    |
| Date Submitted by the Author:   | 27-Nov-2018                                                                                                                                                                                                                                                                                                                                                                                 |
| Complete List of Authors:       | van Delft, Eva A.K.; Amsterdam UMC, Vrije Universiteit Amsterdam, Trauma surgery<br>Bloemers, Frank; VU medisch centrum, Traumasurgery<br>Sosef, Nico L; Spaarne Gasthuis, Trauma Surgery<br>Bonjer, H.J. (Jaap); Amsterdam UMC, Vrije Universiteit Amsterdam, Surgery<br>Schep, Niels W.L.; Maasstad Ziekenhuis, Trauma Surgery<br>Vermeulen, Jeffrey; Maasstad Ziekenhuis, Trauma Surgery |
| <b>Primary Subject Heading</b>: | Surgery                                                                                                                                                                                                                                                                                                                                                                                     |
| Secondary Subject Heading:      | Sports and exercise medicine                                                                                                                                                                                                                                                                                                                                                                |
| Keywords:                       | Adult orthopaedics < ORTHOPAEDIC & TRAUMA SURGERY, Hand & wrist < ORTHOPAEDIC & TRAUMA SURGERY, Orthopaedic & trauma surgery < SURGERY                                                                                                                                                                                                                                                      |
|                                 |                                                                                                                                                                                                                                                                                                                                                                                             |

SCHOLARONE™  
Manuscripts

## TITLE PAGE

**Title:** Dislocated distal radial fractures in adult patients: Four weeks versus Six weeks of cast immobilisation following reduction, a multicenter randomized controlled trial, study protocol.

**Acronym:** DR PIP II study, study protocol (Distal radius plaster immobilisation period)

### Authors and affiliations:

1. *E.A.K. van Delft, MD, PhD candidate, surgical resident [corresponding author]*

Affiliation: Amsterdam UMC, Vrije Universiteit Amsterdam, Department of Trauma Surgery, Amsterdam Movement Sciences

Address: Boelelaan 1117, Amsterdam, The Netherlands

Email: [evavandelft@gmail.com](mailto:evavandelft@gmail.com)

Phone: 0031-204444444

2. *F.W. Bloemers, MD, PhD, MSc, trauma surgeon*

Affiliation: Amsterdam UMC, Vrije Universiteit Amsterdam, Department of Trauma Surgery

Address: Boelelaan 1117, Amsterdam, The Netherlands

Email: [fw.bloemers@vumc.nl](mailto:fw.bloemers@vumc.nl)

3. *N.L. Sosef, MD, trauma surgeon*

Affiliation: Spaarne Gasthuis Hospital, Department of Surgery

Address: Boerhaavelaan 22, 2035 RC, Haarlem, The Netherlands

Email: [nsosef@spaarnegasthuis.nl](mailto:nsosef@spaarnegasthuis.nl)

4. *Prof. H.J. Bonjer, MD, PhD, Professor of Surgery*

Affiliation: Amsterdam UMC, Vrije Universiteit Amsterdam, Department of Surgery

Address: Boelelaan 1117, Amsterdam, The Netherlands

Email: [j.bonjer@vumc.nl](mailto:j.bonjer@vumc.nl)

5. *N.W.L. Schep, MD, PhD, MSc, trauma surgeon*

Affiliation: Maasstad Hospital, Department of Trauma and hand surgery

Address: Maasstadweg 21, 3079 DZ, Rotterdam, The Netherlands

Email: [schepn@maasstadziekenhuis.nl](mailto:schepn@maasstadziekenhuis.nl)

6. *J. Vermeulen, MD, PhD, MSc, trauma surgeon*

Affiliation: Maasstad Hospital, Department of Trauma surgery

Address: Maasstadweg 21, 3079 DZ, Rotterdam, The Netherlands

Email: [vermeulenj@maasstadziekenhuis.nl](mailto:vermeulenj@maasstadziekenhuis.nl)

**Trial registration:** Netherlands National Trial Register: NTR 6600, ABR: NL62861.029.17  
Medical Ethical Committee VUmc registration number: 2018.004

**Protocol version:** 2

**Funding:** no funding was obtained for this study

**Responsibilities:** Project leader: F.W. Bloemers

**Word count:** 2260



1  
2  
3 1 **Dislocated distal radial fractures in adult patients:**  
4 2 **Four weeks versus Six weeks of cast immobilisation following reduction,**  
5 3 **a multicenter randomized controlled trial, study protocol.**  
6  
7  
8  
9

10 5 **ABSTRACT**

11  
12 6 **Introduction:** Up to 30% of patients with a dislocated distal radius fracture treated with  
13 7 closed reduction and cast immobilisation suffer from long-term functional restrictions. It  
14 8 remains unclear, whether duration of cast immobilisation influences functional outcome. The  
15 9 aim of this study is to evaluate whether the functional outcome of dislocated distal radial  
16 10 fractures could be improved by shortening the period of immobilisation.  
17  
18  
19

20 11  
21 12 **Methods and analysis:** A single blinded multicenter randomized controlled trial is  
22 13 initiated. Four weeks of plaster cast immobilisation is compared to six week plaster cast  
23 14 immobilisation in adult patient with adequate reduced distal radial fractures.  
24 15 Primary outcome parameters are functional outcome measured with the Patient Rated Wrist  
25 16 Evaluation after 1 year of follow up. Secondary outcomes are: Disability of Arm, Shoulder  
26 17 and Hand Score after one year, SF-36 after one year, functional outcome earlier in follow up  
27 18 (6 weeks, 12 weeks and 6 months), range of motion, pain level and complications (number of  
28 19 re-interventions, secondary displacement, non-/malunion).  
29  
30  
31  
32  
33  
34

35 21 **Ethics and dissemination:** The medical ethical committee VUmc approved the study  
36 22 protocol (2018.004). The expectation of this study is that a shorter duration of plaster cast  
37 23 immobilisation is beneficial. This risk of specific complications is low and generally similar in  
38 24 both treatment options. Follow-up is standardized according to current trauma guidelines.  
39 25 Present literature indicates that both treatment options that are used within this study are  
40 26 accepted protocols for treatment of displaced distal radius fractures. This trial will provide  
41 27 level-1 evidence for the comparison of functional outcome between the two treatment options  
42 28 for dislocated distal radial fractures. Results of this study are expected to be published as a  
43 29 prospective, multicenter, randomized controlled trial article in 2021.  
44  
45  
46  
47  
48  
49  
50

51 31 **Trial registration:** Netherlands National Trial Register: NTR 6600, ABR: NL62861.029.17  
52 32 Medical Ethical Committee VUmc registration number: 2018.004

53 33 **Keywords:** Distal radial fractures, conservative treatment, immobilisation period  
54  
55  
56  
57  
58  
59  
60

1  
2  
3  
4  
5  
6  
7  
8  
9  
10  
11  
12  
13  
14  
15  
16  
17  
18  
19  
20  
21  
22  
23  
24  
25  
26  
27  
28  
29  
30  
31  
32  
33  
34  
35  
36  
37  
38  
39  
40  
41  
42  
43  
44  
45  
46  
47  
48  
49  
50  
51  
52  
53  
54  
55  
56  
57  
58  
59  
60

1 **Strengths and limitations:**

- 2 • This study is designed as a single blinded study.
- 3 • This multicenter study will be carried out in two hospitals in the Netherlands
- 4 • This studies uses validated outcomes (PRWE, QuickDASH, SF-36).
- 5 • This studies uses both statistical as well as minimal clinical important difference.
- 6 • This trial will provide level-1 evidence for the period of immobilisation in reduced distal
- 7 radial fractures.

For peer review only

## 1 INTRODUCTION

2 Distal radial fractures (DRF) are common fractures and account for up to 20% of all  
3 extremity fractures.[1] Most of these patients can be treated non-operatively in a plaster,  
4 with excellent functional results.[2,3] Nevertheless, up to 30% of patients with a dislocated  
5 DRF suffer from long-term functional restrictions following conservative treatment as  
6 neuropathy, arthrosis and stiffness .[4]

7 Unstable DRF are liable to displace within the first two weeks, only 7-8% displace after this  
8 time and none after six weeks.[5-7] Therefore a period of up to six weeks of immobilisation  
9 is advised, although, this is still a matter of debate in literature.[8,9]

10 Two prospective studies of patients with displaced and reduced DRF showed that a shorter  
11 immobilisation period was safe, without increased numbers of (re)dislocation of the  
12 fracture.[8,10] Besides, the outcome seemed to be better on the long term, in terms of wrist  
13 motion and grip strength. Unfortunately these studies were non-randomized and conducted  
14 in heterogeneous groups of patients suffering both non-dislocated and dislocated fractures.  
15 Obviously, the best treatment of reduced DRF will be short, safe and will lead to an early  
16 return of function. To assess whether reduction of the immobilisation period with two weeks  
17 will lead to better functional outcome, a multicenter randomized controlled trial will be  
18 conducted.

19 The patient reported functional outcome after one year will be assessed using validated  
20 instruments: The Patient Rated Wrist Evaluation (PRWE), the Quick Disability of Arm and  
21 Shoulder (DASH) and SF-36 forms.[11-13] Other outcome measures will be the functional  
22 outcome earlier in follow up, the amount of pain (VAS), number of secondary dislocations,  
23 number of re-interventions, range of motion, non-/malunion and complex regional pain  
24 syndrome (CRPS).

25 The aim of this trial is to compare the results of four weeks of cast immobilisation with six  
26 weeks of cast immobilisation in closed and adequate reduced DRF. Usually an  
27 immobilisation period of five or six weeks is preferred as non-operative treatment of closed  
28 and adequate reduced DRF. Despite the minimal evidence in literature this immobilisation  
29 period can be questioned. A randomized clinical trial with sufficient power will be needed to  
30 provide scientific support for a preferred treatment strategy for reduced DRF.

## 1 METHODS AND ANALYSIS

2 This study will be conducted as a prospective single blinded multicenter randomized clinical  
3 trial in two large teaching hospitals. In this study four weeks of plaster immobilisation will be  
4 compared with six weeks of plaster immobilisation.[Figure 1 and 2] Patients will be treated in  
5 a lower arm cast in neutral position.[14] Following immobilisation treatment will be the same  
6 for both groups, in which additional physiotherapy after removal of the cast is advised and  
7 exercises to train wrist function will be given. As extra structured advise programs may  
8 cause no extra benefit for the patient, this was not generally prescribed. [15] The Medical  
9 Ethics Committee VUmc, the Netherlands (2018.004) has approved the study protocol.

### 10 Patient and Public involvement

11 Evaluation of eligible patients will take place either at the emergency department or at the  
12 outpatient department. They will receive written information and a consent form from the  
13 attending physician, the clinical investigator or a research assistant. Patients will be eligible  
14 if they follow the in- and exclusion criteria:

#### 15 Inclusion criteria:

- 16 1. Age > 18 years;
- 17 2. Primary displaced unilateral DRF;
- 18 3. Independent for activities of daily living.

#### 20 Exclusion criteria:

- 21 1. Fracture of the contralateral wrist;
- 22 2. Ipsilateral fractures proximal of the DRF;
- 23 3. Pre-existent abnormalities or functional deficits of the fractured wrist that influences  
24 the patient reported function of the wrist;
- 25 4. Open fractures;
- 26 5. Language ability to understand the Dutch patient information and questionnaires.

27  
28 Patients will only be able to participate if closed reduction of the distal radial fracture is  
29 adequate. The indication for reduction will be set, using the Lidström criteria for  
30 misalignment.[16] Patients will only be able to participate in this study if reduction is  
31 performed successfully. Successful reduction will be classified as: radial shortening <3mm,  
32 dorsal tilt <10° or intra-articular step-off <2mm, according the guidelines of the American  
33 Association of Orthopedic Surgeons.[17]

1 After providing informed consent, eligible patients will be randomized after two weeks when  
 2 the fracture has proven to be stable. An independent research assistant will perform  
 3 concealed permuted block randomisation using a computer-generated randomisation  
 4 schedule after stratification for fracture type, gender and age. Allocation will be at random in  
 5 four blocks. To prevent bias, stratification by age (younger and older than 60 years) and  
 6 gender will be performed.[table 1]

7  
 8 **Table 1:** *Stratification by gender and age (younger and older than 60 years)*

| Stratification by gender and age     |        |            |                          |
|--------------------------------------|--------|------------|--------------------------|
| Patient characteristics              |        |            | Randomization            |
| List 1                               | Male   | <60 y.o.a. | ABAB AABB ABBA BABA BAAB |
| List 2                               | Male   | >60 y.o.a. | BAAB BBAA ABAB AABB ABBA |
| List 3                               | Female | <60 y.o.a. | AABB ABBA BAAB BBAA BABA |
| List 4                               | Female | >60 y.o.a. | ABBA BABA ABAB AABB AABB |
| <i>A = four weeks, B = six weeks</i> |        |            |                          |

9  
 10  
 11 Randomisation between another 2 or 4 weeks cast immobilisation will be performed to  
 12 complete a total of 4 and 6 weeks of cast immobilisation, respectively. Randomisation will  
 13 occur after informed consent.

14 The primary outcome measure of this study is PRWE after one year.[11] The secondary  
 15 outcome measures are The QuickDASH score after one year[12]; The SF-36 Healthy Survey  
 16 after one year[13]; Functional outcome after 8 weeks, 3 months and 6 months; Range of  
 17 motion; Pain level after 8 weeks, 3 months, 6 months and 1 year; Lidström-score[16]; and  
 18 fracture related complications as secondary dislocation after cast removal, number of re-  
 19 interventions, delayed and non-unions and CRPS.

20 PRWE score is the most responsive instrument for evaluating the outcome in patients with  
 21 DRF. The PRWE is a validated 15-item (scored 1-10), self-reported questionnaire designed  
 22 to help describe the disability experienced by people with disorders of the wrist and also to  
 23 monitor changes in symptoms and function over time. Scores will be transformed to a 0-100  
 24 score.[11] A higher score will indicate greater disability.

25 The DASH Outcome Measure is a validated 30-item, self-reported questionnaire designed  
 26 to help describe the disability experienced by people with upper-limb disorders and also to  
 27 monitor changes in symptoms and function over time.[17] The QuickDASH is a shortened  
 28 version of the DASH Outcome Measure. Instead of 30 items, the QuickDASH uses 11 items

1 (scored 1–5) to measure physical function and symptoms in people with any or multiple  
2 musculoskeletal disorders of the upper limb. At least 10 of the 11 items must be completed  
3 for a score to be calculated. The scores will be transformed to a 0–100 scale for easy  
4 comparison. A higher score will indicate greater disability.[12]

5 The SF-36 is a validated 36-item, self-reported questionnaire designed to describe the  
6 quality of life. The score consists eight subgroups: vitality, mental health social role,  
7 emotional role, physical role, general health, bodily pain, physical functioning. The  
8 subgroups are transformed to a 0-100 scale. The lower the score will be, the more disability,  
9 an higher score will indicate less disability.[13]

10  
11 After inclusion, all patients will be followed for one year in total. Clinical assessments will  
12 occur at the time of admission (ED), one week (3-10-day window), two weeks (11-18-day  
13 window), four weeks (24-32-day window) or six weeks (5-7-week window), three months  
14 (11-15-week window), six months (5-7-month window), and 12 months (11-14-month  
15 window) after inclusion.

16 At each follow up (FU) visit, the research coordinator or research assistant will ascertain  
17 patient status (i.e., secondary interventions, adverse events/complications, deaths) and will  
18 verify information within medical records. All adverse events will be addressed to the  
19 principal investigator.

20 At each FU visit, the patients will be asked to indicate the actual pain level on a VAS.  
21 Patients will also be asked if they have any complaints of their treatment and will be asked if  
22 they are currently treated by a physical therapist. At each visit from eight weeks onwards,  
23 the range of motion of the wrist will be measured using a goniometer, according to the  
24 reference values for joint range of motion published by the American Academy of  
25 Orthopaedic Surgeons [18] In addition, patients will be asked to complete the questionnaires  
26 relating to disability (QuickDASH score, PRWE, SF-36).

27 Plain X-rays of the wrist will be made at the time of presentation in the hospital (ED), after  
28 one and two weeks, 4 or 6 weeks and at the follow-up visit after eight weeks, three months,  
29 six months and one year. The X-ray at one year will be taken in order to determine the  
30 grade of degenerative joint changes. Time to define the presence of a delayed- or malunion  
31 will be at three or six months.[figure 1-3]

32  
33 The primary outcome will be the Patient Rated Wrist Evaluation Score, of which the minimal  
34 clinically important difference is 11.5 points. The standard deviation of the PRWE is

1  
2  
3 1 14.0.[19] Based on a difference of 11.5 points, the sample size of 27 patients per treatment  
4 2 group is calculated with a power (1- $\beta$ ) of 80 percent and a type I error ( $\alpha$ ) of 5 percent,  
5 3 allowing for 10 percent drop-out. In this study, we decided to include 45 patients per  
6 4 treatment group. To allow a 10 percent drop-out in this study, in total 100 patients will be  
7 5 included.  
8  
9  
10

11 6 Data from the demographic data collection and the outcome parameters will be cleaned  
12 7 blindly from the treatment data. Data are presented as mean scores with 95% confidence  
13 8 intervals. The analysis of this study will be carried out according to the intention-to treat  
14 9 principle, i.e. the patients will remain in the group they will be randomly allocated to at  
15 10 baseline. Analysis of functional outcome will be assessed using repeated-measures analysis  
16 11 of variance (GLM 4) with the time as the within-group factor and the treatment as the  
17 12 between-group factor. Post-hoc analysis will be performed on the time of randomisation.  
18 13 Group comparisons at the different time points will be made only when the overall repeated-  
19 14 measures tests are statistically significant. All scores will be tested for normality using the  
20 15 Kolmogorov-Smirnov test. Parametric variables will be compared using the Student's t-test,  
21 16 while non-parametric and ordinal variables will be compared using the Mann-Whitney U  
22 17 statistic. Nominal variables will be compared across independent groups using the chi-  
23 18 squared test or Fisher's exact test. Homogeneity of variance will be assessed using  
24 19 Levene's test. Also, a multiple regression will be performed. SPSS statistical software  
25 20 (version 24.0) will be used for the analysis, in which two-tailed P value < 0.05 will be  
26 21 considered significant.  
27  
28  
29  
30  
31  
32  
33  
34  
35  
36  
37  
38  
39  
40  
41  
42  
43  
44  
45  
46  
47  
48  
49  
50  
51  
52  
53  
54  
55  
56  
57  
58  
59  
60

## 1           2           3           4           5           6           7           8           9           10           11           12           13           14           15           16           17           18           19           20           21           22           23           24           25           26           27           28           29           30           31           32           33           34           35           36           37           38           39           40           41           42           43           44           45           46           47           48           49           50           51           52           53           54           55           56           57           58           59           60

### 1           2           3           4           5           6           7           8           9           10           11           12           13           14           15           16           17

1           2           3           4           5           6           7           8           9           10           11           12           13           14           15           16           17           18           19           20           21           22           23           24           25           26           27           28           29           30           31           32           33           34           35           36           37           38           39           40           41           42           43           44           45           46           47           48           49           50           51           52           53           54           55           56           57           58           59           60

2 Present literature indicates that four weeks of immobilisation as well as six weeks of  
3 immobilisation are both accepted protocols for treatment of displaced DRF. In daily practise,  
4 a six weeks immobilisation period is mostly used. To assess the clinical controversy on this  
5 duration of treatment, this study is initiated.

6 The studies done for assessing the immobilisation periods of DRF have their limitations of  
7 using non-validated outcome score lists, which makes it impossible to conclude with certainty  
8 shorter immobilisation periods of DRF are preferred.

9 The expectation of this study is that a shorter duration of plaster cast immobilisation is  
10 beneficial for the patients. This risk of specific complications is low and generally similar in  
11 both treatment options.

12  
13 The Medical Ethical Committee VUmc has approved the study protocol (2018.004).

14 This trial will provide level-1 evidence for the comparison of functional outcome between the  
15 two treatment options for dislocated DRF. Results of this study are expected to be published  
16 as a prospective, multicenter, randomized controlled trial article in 2021.



## REFERENCES

1. **Meena S, Sharma P, Sambharia AK, Dawar A**, Fracture of Distal Radius: An overview. *J Family Medicine and Primary Care*, 2014; 3(4): 325-332.
2. **Cooney WP**, Management of Colles' fractures. *J Hand Surg Br*, 1989;14(2): 137–139.
3. **McQueen M, Caspers J**, Colles fracture: does the anatomical result affect the final function? *J Bone Joint Surg*, 1988; 70(4): 649–651.
4. **Cooney WP, James M.D, Dobyns J.H, Linscheid R.L**, Complications of Colles fractures. *J Bone Joint Surg Am*, 1980; 62(4): 613-619.
5. **Solgaard S**, Early displacement of distal radius fracture. *Acta Orthopedica Scandinavia*, 1986; 57(3): 229–231.
6. **Abbaszadegan H, Sivers KV, Jonsson U**, Late displacement of Colles'fractures. *Int Orthopedics*, 1988; 12(3): 197–199.
7. **Solgaard S**, Function after distal radius fracture. *Acta Orthop Scand*, 1988; 59(1): 39–42.
8. **McAuliffe TB, Hilliar KM, Coates CJ, Grange WJ**, Early mobilisation of Colles' fractures. *J Bone Joint Surg Br*, 1987; 69(5) :727-729.
9. **Christensen OM, Christiansen TG, Krasheninnikhoff M, Hanssen FF**, Length of immobilization after fractures of the distal radius. *Int Orthop*, 1995;19(1): 26-9.
10. **Vang Hansen F, Staunstrup H, Mikkelsen S**, A comparison of 3 and 5 weeks immobilisation for Older type 1 and 2 Colles' fractures. *J Hand Surg Br*, 1998; 23(3): 400-401.
11. **MacDermid JC, Turgeon T, Richards RS, Beadle M, Roth JH**, Patient rating of wrist pain and disability: a reliable and valid measurement tool. *J Orthop Trauma*, 1998; 12(8): 577–586.
12. **Gummesson C, Ward MM, Atroshi I**, The shortened disabilities of the arm, shoulder and hand questionnaire (QuickDASH): validity and reliability based on responses within the full-length DASH. *BMC Musculoskelet Disord*, 2006; 7-44.
13. **Aaronson NK, Muller M, Cohen PD, Essink-Bot ML, Fekkes M, Sanderman R, Sprangers MA, te Velde A, Verrips E**, Translation, validation, and norming of the Dutch language version of the SF-36 Health Survey in community and chronic disease. *J Clin Epidemiol*, 1998; 51(11): 1055-1068.
14. **Handol HHG, Madhok R**, Conservative interventions for treating distal radial fractures in adults. *Cochrane Database of Systematic Reviews*, 2003; (2):CD000314
15. **Bruder AM, Shields N, Dodd KJ, Hau R, Taylor NF**, A progressive exercise and structured advice program does not improve activity more than structured advice alone following a distal radial fracture: a multi-centre, randomised trial. *Journal of Physiotherapy*, 2016 ; 62:145-52
16. **Lidström A**, Fractures of the distal end of the radius: a clinical and statistical study of end results. *Acta Orthop Scand Suppl*, 195; 41:1–118.
17. **AAOS**, The treatment of distal radius fractures, guideline and evidence report, December 5, 2009.
18. **Greene W, Heckman JD**, The Clinical Measurement of Joint Motion. Rosemont, IL: American Academy of Orthopaedic Surgeons, 1994.
19. **Walenkamp MM, de Muinck Keizer RJ, Goslings JC, Vos LM, Rosenwasser MP, Schep MW**, The minimum clinically important Difference of the Patient-rated Wrist

1  
2  
3  
4  
5  
6  
7  
8  
9  
10  
11  
12  
13  
14  
15  
16  
17  
18  
19  
20  
21  
22  
23  
24  
25  
26  
27  
28  
29  
30  
31  
32  
33  
34  
35  
36  
37  
38  
39  
40  
41  
42  
43  
44  
45  
46  
47  
48  
49  
50  
51  
52  
53  
54  
55  
56  
57  
58  
59  
60

1            EvaluationScore for Patients with distal radius fractures, *Clin Orthop Relat Res.*  
2            2015 473(10):3235-41

For peer review only

## AUTHORS CONTRIBUTIONS

|                           |                                                                                                              |
|---------------------------|--------------------------------------------------------------------------------------------------------------|
| <u>E.A.K. van Delft:</u>  | Study development, writing study protocol,<br>Clinical investigator in Amsterdam UMC, VU Medical Center      |
| <u>F.W. Bloemers:</u>     | Project leader, corrections of study protocol                                                                |
| <u>N.L. Sosef:</u>        | First clinical investigator in Spaarne Gasthuis                                                              |
| <u>Prof. H.J. Bonjer:</u> | Head of department of Surgery Amsterdam UMC, VU Medical Center<br>Approval of the study protocol             |
| <u>N.W.L. Schep:</u>      | Study development                                                                                            |
| <u>J. Vermeulen:</u>      | Initial first clinical investigator in Spaarne Gasthuis,<br>study development, Corrections of study protocol |

## LIST OF ABBREVIATIONS

|           |                                                                                                                                                                                                      |
|-----------|------------------------------------------------------------------------------------------------------------------------------------------------------------------------------------------------------|
| AAOS      | American Association of Orthopedic Surgeons                                                                                                                                                          |
| ABR       | ABR form, General Assessment and Registration form, is the application form that is required for submission to the accredited Ethics Committee (In Dutch, ABR = Algemene Beoordeling en Registratie) |
| AVG       | Algemene verordening gegevensbescherming (Dutch Data Protection Act)                                                                                                                                 |
| CRPS      | Complex regional pain syndrome                                                                                                                                                                       |
| DASH      | Disability of Arm, Shoulder and Hand                                                                                                                                                                 |
| ED        | Emergency Department                                                                                                                                                                                 |
| IC        | Informed Consent                                                                                                                                                                                     |
| METC      | Medical research ethics committee (MREC)                                                                                                                                                             |
| NTR       | Nederlands Trial Register                                                                                                                                                                            |
| PRWE      | Patient Rated Wrist Evaluation                                                                                                                                                                       |
| qDASH     | Quick Disability of Arm, Shoulder and Hand                                                                                                                                                           |
| QuickDASH | Quick Disability of Arm, Shoulder and Hand                                                                                                                                                           |
| SPSS      | Statistical Package for the Social Sciences                                                                                                                                                          |
| VAS       | Visual analogue scale                                                                                                                                                                                |
| VUmc      | Vrije Universiteit Medical Center Amsterdam                                                                                                                                                          |
| X-ray     | Radiography                                                                                                                                                                                          |

## FIGURE LEGENDS

|          |                                                                       |
|----------|-----------------------------------------------------------------------|
| Figure 1 | Inclusion procedure                                                   |
| Figure 2 | Control of alignment and randomization procedure                      |
| Figure 3 | Follow-up scheme four versus six weeks of plaster cast immobilization |

1  
2  
3 **1 Ethics approval and consent to participate:**

4 2 The study is submitted to the Medical Ethics Committee VU Medical Center Amsterdam and  
5 3 Regional Ethical Committee and will be carried out in compliance with the Declaration of  
6 4 Helsinki on Ethical principles for medical research involving human subjects. The Medical  
7 5 Ethics Committee VU Medical Center Amsterdam acts as central ethics committee for this  
8 6 trial (reference number: NL62861.029.17)  
9  
10  
11  
12  
13

14 **8 Consent for publication:**

15 9 All patients will provide informed consent before participation in the trial. The data will be  
16 10 coded by patient number. Research data will be stored in a database (IBM SPSS Statistics  
17 11 for Windows, Version 22.0. Armonk, NY: IBM Corp. Released 2013), and will be handled  
18 12 confidentially and anonymously.  
19  
20  
21  
22  
23

24 **14 Availability of data and materials:**

25 15 The data will be coded by patient number. Research data will be stored in a database (IBM  
26 16 SPSS Statistics for Windows, Version 22.0. Armonk, NY: IBM Corp. Released 2013), and will  
27 17 be handled confidentially and anonymously. Research data that can be traced to individual  
28 18 persons can only be viewed by authorized personnel. These persons are the members of the  
29 19 research team, members of the health care inspection, and members of the Medical Ethics  
30 20 Committee of the Amsterdam UMC, VU Medical Center Amsterdam. Review of the data may  
31 21 be necessary to ensure the reliability and quality of the research. The handling of personal  
32 22 data is in compliance with the Data Protection Act (in Dutch: Algemene verordening  
33 23 gegevens bescherming, AVG) and the privacy regulation of the Amsterdam UMC, VU  
34 24 Medical Center Amsterdam.  
35  
36  
37  
38  
39  
40  
41  
42

43 **26 Competing interests:**

44 27 The authors declare that they have no competing interests.  
45  
46  
47  
48

49 **29 Funding:**

50 30 No external funding was received for this study.  
51  
52

53 **32 Authors' contributions:**

54 33 All authors participated in the design and the drafting of the manuscript. All authors have  
55 34 read an approved the final manuscript.  
56  
57

58 **36 Acknowledgements:**

59 37 Not applicable.  
60

## Figure 1: Inclusion procedure

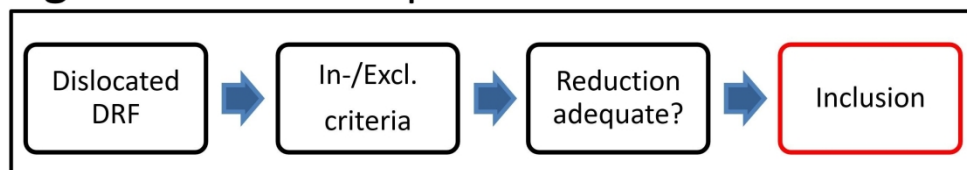

Figure 1 Inclusion procedure

227x59mm (300 x 300 DPI)

1  
2  
3  
4  
5  
6  
7  
8  
9  
10  
11  
12  
13  
14  
15  
16  
17  
18  
19  
20  
21  
22  
23  
24  
25  
26  
27  
28  
29  
30  
31  
32  
33  
34  
35  
36  
37  
38  
39  
40  
41  
42  
43  
44  
45  
46  
47  
48  
49  
50  
51  
52  
53  
54  
55  
56  
57  
58  
59  
60

**Figure 2:** Control of alignment and randomization procedure

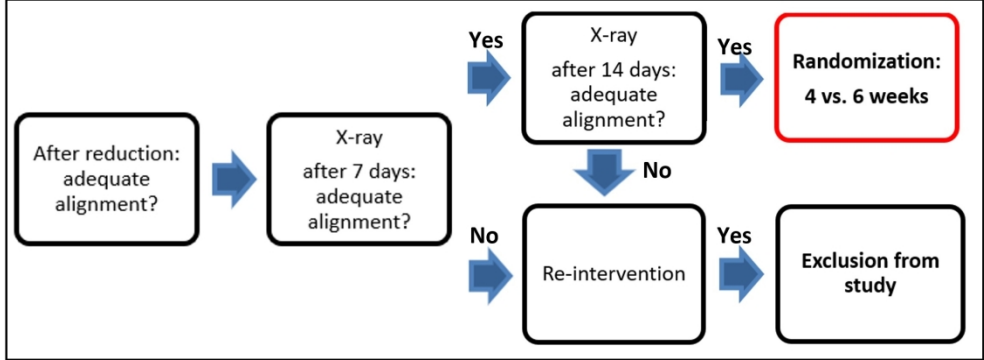

Figure 2 Control of alignment and randomization procedure

198x86mm (300 x 300 DPI)

Figure 3: follow-up scheme four versus six weeks plaster cast immobilization

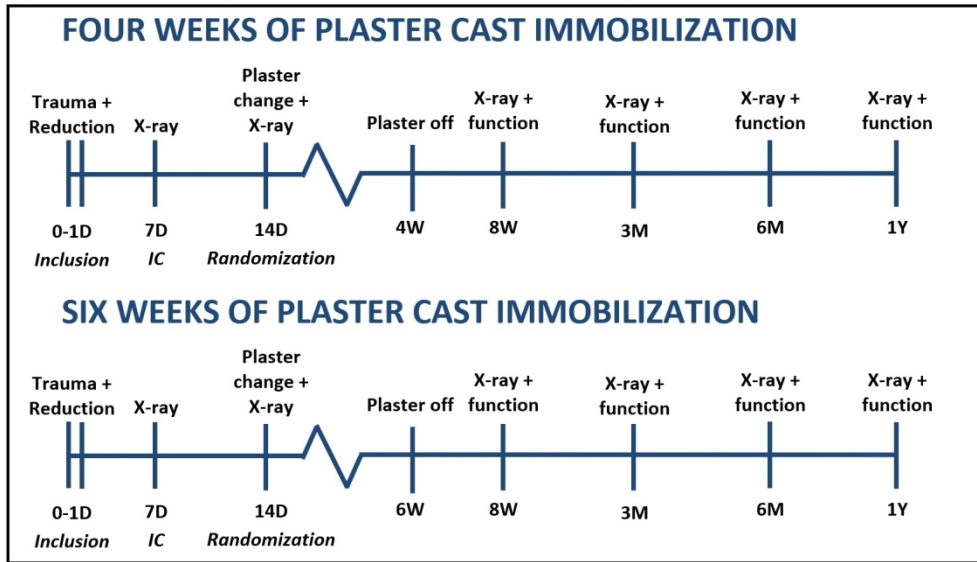

IC: informed consent. X-ray: control X-ray according to standard guidelines, assessment using Lidström score. Function: functional assessment using PRWE, QuickDASH, SF-36, range of motion, VAS scale

Figure 3 Follow-up scheme four versus six weeks of plaster cast immobilization

145x97mm (300 x 300 DPI)



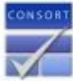

### CONSORT 2010 checklist of information to include when reporting a randomised trial\*

| Section/Topic                    | Item No | Checklist item                                                                                                                                                                              | Reported on page No |
|----------------------------------|---------|---------------------------------------------------------------------------------------------------------------------------------------------------------------------------------------------|---------------------|
| <b>Title and abstract</b>        |         |                                                                                                                                                                                             |                     |
|                                  | 1a      | Identification as a randomised trial in the title                                                                                                                                           | 1                   |
|                                  | 1b      | Structured summary of trial design, methods, results, and conclusions (for specific guidance see CONSORT for abstracts)                                                                     | 1                   |
| <b>Introduction</b>              |         |                                                                                                                                                                                             |                     |
| Background and objectives        | 2a      | Scientific background and explanation of rationale                                                                                                                                          | 3                   |
|                                  | 2b      | Specific objectives or hypotheses                                                                                                                                                           | 3                   |
| <b>Methods</b>                   |         |                                                                                                                                                                                             |                     |
| Trial design                     | 3a      | Description of trial design (such as parallel, factorial) including allocation ratio                                                                                                        | 4                   |
|                                  | 3b      | Important changes to methods after trial commencement (such as eligibility criteria), with reasons                                                                                          | n.a.                |
| Participants                     | 4a      | Eligibility criteria for participants                                                                                                                                                       | 4                   |
|                                  | 4b      | Settings and locations where the data were collected                                                                                                                                        | 4/5                 |
| Interventions                    | 5       | The interventions for each group with sufficient details to allow replication, including how and when they were actually administered                                                       | 4-7                 |
| Outcomes                         | 6a      | Completely defined pre-specified primary and secondary outcome measures, including how and when they were assessed                                                                          | 5                   |
|                                  | 6b      | Any changes to trial outcomes after the trial commenced, with reasons                                                                                                                       | n.a.                |
| Sample size                      | 7a      | How sample size was determined                                                                                                                                                              | 7                   |
|                                  | 7b      | When applicable, explanation of any interim analyses and stopping guidelines                                                                                                                | n.a.                |
| <b>Randomisation:</b>            |         |                                                                                                                                                                                             |                     |
| Sequence generation              | 8a      | Method used to generate the random allocation sequence                                                                                                                                      | 5                   |
|                                  | 8b      | Type of randomisation; details of any restriction (such as blocking and block size)                                                                                                         | 5                   |
| Allocation concealment mechanism | 9       | Mechanism used to implement the random allocation sequence (such as sequentially numbered containers), describing any steps taken to conceal the sequence until interventions were assigned | 5                   |
| Implementation                   | 10      | Who generated the random allocation sequence, who enrolled participants, and who assigned participants to interventions                                                                     | 5.6                 |
| Blinding                         | 11a     | If done, who was blinded after assignment to interventions (for example, participants, care providers, those                                                                                | 6                   |



|                                                      |     |                                                                                                                                                   |                   |
|------------------------------------------------------|-----|---------------------------------------------------------------------------------------------------------------------------------------------------|-------------------|
|                                                      |     | assessing outcomes) and how                                                                                                                       |                   |
|                                                      | 11b | If relevant, description of the similarity of interventions                                                                                       | n.a.              |
| Statistical methods                                  | 12a | Statistical methods used to compare groups for primary and secondary outcomes                                                                     | 7,8               |
|                                                      | 12b | Methods for additional analyses, such as subgroup analyses and adjusted analyses                                                                  | 8                 |
| <b>Results</b>                                       |     |                                                                                                                                                   |                   |
| Participant flow (a diagram is strongly recommended) | 13a | For each group, the numbers of participants who were randomly assigned, received intended treatment, and were analysed for the primary outcome    | 7                 |
|                                                      | 13b | For each group, losses and exclusions after randomisation, together with reasons                                                                  | 7,8               |
| Recruitment                                          | 14a | Dates defining the periods of recruitment and follow-up                                                                                           | 6                 |
|                                                      | 14b | Why the trial ended or was stopped                                                                                                                | n.a.              |
| Baseline data                                        | 15  | A table showing baseline demographic and clinical characteristics for each group                                                                  | study             |
| Numbers analysed                                     | 16  | For each group, number of participants (denominator) included in each analysis and whether the analysis was by original assigned groups           | protocol<br>n.a.  |
| Outcomes and estimation                              | 17a | For each primary and secondary outcome, results for each group, and the estimated effect size and its precision (such as 95% confidence interval) | study<br>protocol |
|                                                      | 17b | For binary outcomes, presentation of both absolute and relative effect sizes is recommended                                                       | n.a.              |
| Ancillary analyses                                   | 18  | Results of any other analyses performed, including subgroup analyses and adjusted analyses, distinguishing pre-specified from exploratory         | study<br>protocol |
| Harms                                                | 19  | All important harms or unintended effects in each group (for specific guidance see CONSORT for harms)                                             | n.a.              |
| <b>Discussion</b>                                    |     |                                                                                                                                                   |                   |
| Limitations                                          | 20  | Trial limitations, addressing sources of potential bias, imprecision, and, if relevant, multiplicity of analyses                                  | study<br>protocol |
| Generalisability                                     | 21  | Generalisability (external validity, applicability) of the trial findings                                                                         |                   |
| Interpretation                                       | 22  | Interpretation consistent with results, balancing benefits and harms, and considering other relevant evidence                                     |                   |
| <b>Other information</b>                             |     |                                                                                                                                                   |                   |
| Registration                                         | 23  | Registration number and name of trial registry                                                                                                    | 1                 |
| Protocol                                             | 24  | Where the full trial protocol can be accessed, if available                                                                                       | 1                 |
| Funding                                              | 25  | Sources of funding and other support (such as supply of drugs), role of funders                                                                   | 12                |

\*We strongly recommend reading this statement in conjunction with the CONSORT 2010 Explanation and Elaboration for important clarifications on all the items. If relevant, we also recommend reading CONSORT extensions for cluster randomised trials, non-inferiority and equivalence trials, non-pharmacological treatments, herbal interventions, and pragmatic trials. Additional extensions are forthcoming: for those and for up to date references relevant to this checklist, see [www.consort-statement.org](http://www.consort-statement.org).

# BMJ Open

## Dislocated distal radial fractures in adult patients: Four weeks versus Six weeks of cast immobilisation following reduction, a multicenter randomised controlled trial, study protocol

|                                 |                                                                                                                                                                                                                                                                                                                                                                                             |
|---------------------------------|---------------------------------------------------------------------------------------------------------------------------------------------------------------------------------------------------------------------------------------------------------------------------------------------------------------------------------------------------------------------------------------------|
| Journal:                        | <i>BMJ Open</i>                                                                                                                                                                                                                                                                                                                                                                             |
| Manuscript ID                   | bmjopen-2018-026540.R2                                                                                                                                                                                                                                                                                                                                                                      |
| Article Type:                   | Protocol                                                                                                                                                                                                                                                                                                                                                                                    |
| Date Submitted by the Author:   | 18-Dec-2018                                                                                                                                                                                                                                                                                                                                                                                 |
| Complete List of Authors:       | van Delft, Eva A.K.; Amsterdam UMC, Vrije Universiteit Amsterdam, Trauma surgery<br>Bloemers, Frank; VU medisch centrum, Traumasurgery<br>Sosef, Nico L; Spaarne Gasthuis, Trauma Surgery<br>Bonjer, H.J. (Jaap); Amsterdam UMC, Vrije Universiteit Amsterdam, Surgery<br>Schep, Niels W.L.; Maasstad Ziekenhuis, Trauma Surgery<br>Vermeulen, Jeffrey; Maasstad Ziekenhuis, Trauma Surgery |
| <b>Primary Subject Heading</b>: | Surgery                                                                                                                                                                                                                                                                                                                                                                                     |
| Secondary Subject Heading:      | Sports and exercise medicine                                                                                                                                                                                                                                                                                                                                                                |
| Keywords:                       | Adult orthopaedics < ORTHOPAEDIC & TRAUMA SURGERY, Hand & wrist < ORTHOPAEDIC & TRAUMA SURGERY, Orthopaedic & trauma surgery < SURGERY                                                                                                                                                                                                                                                      |
|                                 |                                                                                                                                                                                                                                                                                                                                                                                             |

SCHOLARONE™  
Manuscripts

## TITLE PAGE

**Title:** Dislocated distal radial fractures in adult patients: Four weeks versus Six weeks of cast immobilisation following reduction, a multicenter randomised controlled trial, study protocol.

**Acronym:** DR PIP II study, study protocol (Distal radial plaster immobilisation period)

### Authors and affiliations:

1. *E.A.K. van Delft, MD, PhD candidate, surgical resident [corresponding author]*

Affiliation: Amsterdam UMC, Vrije Universiteit Amsterdam, Department of Trauma Surgery, Amsterdam Movement Sciences

Address: Boelelaan 1117, Amsterdam, The Netherlands

Email: [evavandelft@gmail.com](mailto:evavandelft@gmail.com)

Phone: 0031-204444444

2. *F.W. Bloemers, MD, PhD, MSc, trauma surgeon*

Affiliation: Amsterdam UMC, Vrije Universiteit Amsterdam, Department of Trauma Surgery

Address: Boelelaan 1117, Amsterdam, The Netherlands

Email: [fw.bloemers@vumc.nl](mailto:fw.bloemers@vumc.nl)

3. *N.L. Sosef, MD, trauma surgeon*

Affiliation: Spaarne Gasthuis Hospital, Department of Surgery

Address: Boerhaavelaan 22, 2035 RC, Haarlem, The Netherlands

Email: [nsosef@spaarnegasthuis.nl](mailto:nsosef@spaarnegasthuis.nl)

4. *Prof. H.J. Bonjer, MD, PhD, Professor of Surgery*

Affiliation: Amsterdam UMC, Vrije Universiteit Amsterdam, Department of Surgery

Address: Boelelaan 1117, Amsterdam, The Netherlands

Email: [j.bonjer@vumc.nl](mailto:j.bonjer@vumc.nl)

5. *N.W.L. Schep, MD, PhD, MSc, trauma surgeon*

Affiliation: Maasstad Hospital, Department of Trauma and hand surgery

Address: Maasstadweg 21, 3079 DZ, Rotterdam, The Netherlands

Email: [schepn@maasstadziekenhuis.nl](mailto:schepn@maasstadziekenhuis.nl)

6. *J. Vermeulen, MD, PhD, MSc, trauma surgeon*

Affiliation: Maasstad Hospital, Department of Trauma surgery

Address: Maasstadweg 21, 3079 DZ, Rotterdam, The Netherlands

Email: [vermeulenj@maasstadziekenhuis.nl](mailto:vermeulenj@maasstadziekenhuis.nl)

**Trial registration:** Netherlands National Trial Register: NTR 6600, ABR: NL62861.029.17  
Medical Ethical Committee VUmc registration number: 2018.004

**Protocol version:** 3

**Funding:** no funding was obtained for this study

**Responsibilities:** Project leader: F.W. Bloemers

**Word count:** 1952

1  
2  
3 1 **Dislocated distal radial fractures in adult patients:**  
4 2 **Four weeks versus Six weeks of cast immobilisation following reduction,**  
5 3 **a multicenter randomised controlled trial, study protocol.**  
6  
7  
8  
9 4

10 5 **ABSTRACT**

11  
12 6 **Introduction:** Up to 30% of patients with a dislocated distal radial fracture treated with  
13 7 closed reduction and cast immobilisation suffer from long-term functional restrictions. It  
14 8 remains unclear, whether duration of cast immobilisation influences functional outcome. The  
15 9 aim of this study is to evaluate whether the functional outcome of dislocated distal radial  
16 10 fractures could be improved by shortening the period of immobilisation.  
17  
18  
19

20 11  
21 12 **Methods and analysis:** A single blinded multicenter randomised controlled trial is  
22 13 initiated. Four weeks of plaster cast immobilisation is compared to six week plaster cast  
23 14 immobilisation in adult patient with adequate reduced distal radial fractures.  
24 15 Primary outcome parameters are functional outcome measured with the Patient Rated Wrist  
25 16 Evaluation after 1 year of follow up. Secondary outcomes are: Disability of Arm, Shoulder  
26 17 and Hand Score after one year, SF-36 after one year, functional outcome earlier in follow up  
27 18 (6 weeks, 12 weeks and 6 months), range of motion, pain level and complications: number of  
28 19 re-interventions, secondary dislocation, delayed and non-union.  
29  
30  
31  
32  
33  
34 20

35 21 **Ethics and dissemination:** The medical ethical committee VUmc approved the study  
36 22 protocol (2018.004, NL62861.029.17). The expectation of this study is that a shorter duration  
37 23 of plaster cast immobilisation is beneficial. This risk of specific complications is low and  
38 24 generally similar in both treatment options. Follow-up is standardized according to current  
39 25 trauma guidelines. Present literature indicates that both treatment options that are used  
40 26 within this study are accepted protocols for treatment of dislocated distal radial fractures.  
41 27 This trial will provide level-1 evidence for the comparison of functional outcome between the  
42 28 two treatment options for dislocated distal radial fractures. Results of this study are expected  
43 29 to be published as a prospective, multicenter, randomised controlled trial article in 2021.  
44  
45  
46  
47  
48  
49  
50 30

51 31 **Trial registration:** Netherlands National Trial Register: NTR 6600, ABR: NL62861.029.17  
52 32 Medical Ethical Committee VUmc registration number: 2018.004

53 33 **Keywords:** Distal radial fractures, conservative treatment, immobilisation period  
54  
55  
56  
57  
58  
59  
60 34

1  
2  
3 **1 Strengths and limitations:**  
4

- 5 2 • This study is designed as a single blinded study, it was not possible to perform this  
6 3 study in a double blinded setting.  
7  
8 4 • This multicenter study will be carried out in two hospitals in the Netherlands.  
9  
10 5 • This stud uses validated outcomes (PRWE, QuickDASH, SF-36).  
11 6 • This study uses both statistical as well as minimal clinical important difference.  
12  
13 7 • This trial will provide level-1 evidence for the period of immobilisation in reduced distal  
14 8 radial fractures.  
15  
16 9  
17  
18 10

19  
20  
21  
22  
23  
24  
25  
26  
27  
28  
29  
30  
31  
32  
33  
34  
35  
36  
37  
38  
39  
40  
41  
42  
43  
44  
45  
46  
47  
48  
49  
50  
51  
52  
53  
54  
55  
56  
57  
58  
59  
60

For peer review only

## 1 INTRODUCTION

2 Distal radial fractures (DRF) are common fractures and account for up to 20% of all  
3 extremity fractures.[1] Most of these patients can be treated non-operatively in a plaster with  
4 excellent functional results.[2,3] Nevertheless, up to 30% of patients with a dislocated DRF  
5 suffer from long-term functional restrictions following conservative treatment as neuropathy,  
6 arthrosis and stiffness.[4]

7 Unstable DRF are liable to dislocate within the first two weeks, only 7-8% dislocate after this  
8 time and none after six weeks.[5-7] Therefore a period of up to six weeks of immobilisation  
9 is advised, although, this is still a matter of debate in literature.[8,9]

10 Two prospective studies of patients with dislocated and reduced DRF showed that a shorter  
11 immobilisation period was safe, without increased numbers of (re)dislocation of the  
12 fracture.[8,10] Besides, the outcome seemed to be better on the long term, in terms of wrist  
13 motion and grip strength. Unfortunately these studies were non-randomised and conducted  
14 in heterogeneous groups of patients suffering both non-dislocated and dislocated fractures.  
15 Obviously, the best treatment of reduced DRF will be short, safe and will lead to an early  
16 return of function. To assess whether reduction of the immobilisation period with two weeks  
17 will lead to better functional outcome, a multicenter randomised controlled trial will be  
18 conducted.

19 The patient reported functional outcome after one year will be assessed using validated  
20 instruments: The Patient Rated Wrist Evaluation (PRWE), the Quick Disability of Arm and  
21 Shoulder (DASH) and SF-36 forms.[11-13] Other outcome measures will be the functional  
22 outcome earlier in follow up, the amount of pain (VAS), number of secondary dislocations,  
23 number of re-interventions, range of motion, delayed and non-union and complex regional  
24 pain syndrome (CRPS).

25 The aim of this trial is to compare the results of four weeks of cast immobilisation with six  
26 weeks of cast immobilisation in closed and adequate reduced DRF. Usually an  
27 immobilisation period of five or six weeks is preferred as non-operative treatment of closed  
28 and adequate reduced DRF. Despite the minimal evidence in literature this immobilisation  
29 period can be questioned. A randomised clinical trial with sufficient power will be needed to  
30 provide scientific support for a preferred treatment strategy for reduced DRF.

## 1           2           3           4           5           6           7           8           9           10           11           12           13           14           15           16           17           18           19           20           21           22           23           24           25           26           27           28           29           30           31           32           33           34           35           36           37           38           39           40           41           42           43           44           45           46           47           48           49           50           51           52           53           54           55           56           57           58           59           60

# 1           2           3           4           5           6           7           8           9           10           11           12           13           14           15           16           17           18           19           20           21           22           23           24           25           26           27           28           29           30           31           32           33           34           35

## 1           2           3           4           5           6           7           8           9           10           11           12           13           14           15           16           17           18           19           20           21           22           23           24           25           26           27           28           29           30           31           32           33           34           35

# METHODS AND ANALYSIS

This study will be conducted as a prospective single blinded multicenter randomised clinical trial in two large teaching hospitals. In this study four weeks of plaster immobilisation will be compared with six weeks of plaster immobilisation.[Figure 1 and 2] The methods of this study protocol are comparable to a previous published article comparing three weeks of cast immobilisation to five weeks of cast immobilisation in adult patients with non displaced DRF. [14,15] Patients will be treated in a lower arm cast in neutral position.[16] Following immobilisation, treatment will be the same for both groups, in which additional physiotherapy after removal of the cast is advised and exercises to train wrist function will be given. As extra structured advise programs may cause no extra benefit for the patient, this was not generally prescribed.[17] However, during follow-up visits, patients will be asked if they were treated by a physiotherapist. If this is the case, details on the number of sessions per week and the total number of weeks the patient received physiotherapy, will be collected. The Medical Ethics Committee VUmc, the Netherlands (2018.004) has approved the study protocol.

### Participants

Evaluation of eligible patients will take place either at the emergency department or at the outpatient department. They will receive written information and a consent form from the attending physician, the clinical investigator or a research assistant. Patients eligible if they follow the in- and exclusion criteria:

#### Inclusion criteria:

1. Age > 18 years;
2. Primary dislocated unilateral DRF;
3. Independent for activities of daily living.

#### Exclusion criteria:

1. Fracture of the contralateral wrist;
2. Ipsilateral fractures proximal of the DRF;
3. Pre-existent abnormalities or functional deficits of the fractured wrist that influences the patient reported function of the wrist;
4. Open fractures;
5. Language ability to understand the Dutch patient information and questionnaires.

Patients will only be able to participate if closed reduction of the distal radial fracture is adequate. The indication for reduction will be set, using the Lidström criteria for



1 misalignment.[18] Patients will only be able to participate in this study if reduction is  
 2 performed successfully. Successful reduction will be classified as: radial shortening <3mm,  
 3 dorsal tilt <10° or intra-articular step-off <2mm, according the guidelines of the American  
 4 Association of Orthopedic Surgeons.[19]

5 After providing informed consent, eligible patients will be randomised after two weeks when  
 6 the fracture has proven to be stable. An independent research assistant will perform  
 7 concealed permuted block randomisation using a computer-generated randomisation  
 8 schedule after stratification for fracture type, gender and age. Allocation will be at random in  
 9 four blocks. To prevent bias, stratification by age (younger and older than 60 years) and  
 10 gender will be performed.[Table 1]

11 **Table 1:** *Stratification by gender and age (younger and older than 60 years)*

| Stratification by gender and age |                   |                          |
|----------------------------------|-------------------|--------------------------|
| Patient characteristics          |                   | Randomisation            |
| List 1                           | Male <60 y.o.a.   | ABAB AABB ABBA BABA BAAB |
| List 2                           | Male >60 y.o.a.   | BAAB BBAA ABAB AABB ABBA |
| List 3                           | Female <60 y.o.a. | AABB ABBA BAAB BBAA BABA |
| List 4                           | Female >60 y.o.a. | ABBA BABA ABAB AABB AABB |

*A = four weeks, B = six weeks*

12  
 13 Randomisation between another 2 or 4 weeks cast immobilisation will be performed to  
 14 complete a total of 4 and 6 weeks of cast immobilisation, respectively. Randomisation will  
 15 occur after informed consent.

16 The primary outcome measure of this study is PRWE after one year.[11] The secondary  
 17 outcome measures are The QuickDASH score after one year[12]; The SF-36 Healthy Survey  
 18 after one year[13]; Functional outcome after 8 weeks, 3 months and 6 months; Range of  
 19 motion; Pain level after 8 weeks, 3 months, 6 months and 1 year; Lidström-score[18]; and  
 20 fracture related complications: secondary dislocation after cast removal, number of re-  
 21 interventions, delayed and non-unions and CRPS.

22 PRWE score is the most responsive instrument for evaluating the outcome in patients with  
 23 DRF. The PRWE is a validated 15-item (scored 1-10), self-reported questionnaire designed  
 24 to help describe the disability experienced by people with disorders of the wrist and also to  
 25 monitor changes in symptoms and function over time. Scores will be transformed to a 0-100  
 26 score.[11] A higher score will indicate greater disability.



1  
2  
3 1 The DASH Outcome Measure is a validated 30-item, self-reported questionnaire designed  
4 2 to help describe the disability experienced by people with upper-limb disorders and also to  
5 3 monitor changes in symptoms and function over time.[19] The QuickDASH is a shortened  
6 4 version of the DASH Outcome Measure. Instead of 30 items, the QuickDASH uses 11 items  
7 5 (scored 1–5) to measure physical function and symptoms in people with any or multiple  
8 6 musculoskeletal disorders of the upper limb. At least 10 of the 11 items must be completed  
9 7 for a score to be calculated. The scores will be transformed to a 0–100 scale for easy  
10 8 comparison. A higher score will indicate greater disability.[12]

11 9 The SF-36 is a validated 36-item, self-reported questionnaire designed to describe the  
12 10 quality of life. The score consists eight subgroups: vitality, mental health social role,  
13 11 emotional role, physical role, general health, bodily pain, physical functioning. The  
14 12 subgroups are transformed to a 0-100 scale. The lower the score will be, the more disability,  
15 13 an higher score will indicate less disability.[13]

16 14  
17 15 After inclusion, all patients will be followed for one year in total. Clinical assessments will  
18 16 occur at the time of admission (ED), one week (3-10-day window), two weeks (11-18-day  
19 17 window), four weeks (24-32-day window) or six weeks (5-7-week window), three months  
20 18 (11-15-week window), six months (5-7-month window), and 12 months (11-14-month  
21 19 window) after inclusion.

22 20 At each follow up (FU) visit, the research coordinator or research assistant will ascertain  
23 21 patient status (i.e., secondary interventions, adverse events/complications, deaths) and will  
24 22 verify information within medical records. All adverse events will be addressed to the  
25 23 principal investigator.

26 24 At each FU visit, the patients will be asked to indicate the actual pain level on a VAS.  
27 25 Patients will also be asked if they have any complaints of their treatment and will be asked if  
28 26 they are currently treated by a physical therapist. At each visit from eight weeks onwards,  
29 27 the range of motion of the wrist will be measured using a goniometer, according to the  
30 28 reference values for joint range of motion published by the American Academy of  
31 29 Orthopaedic Surgeons [20] In addition, patients will be asked to complete the questionnaires  
32 30 relating to disability (QuickDASH score, PRWE, SF-36).

33 31 Plain X-rays of the wrist will be made at the time of presentation in the hospital (ED), after  
34 32 one and two weeks, 4 or 6 weeks and at the follow-up visit after eight weeks, three months,  
35 33 six months and one year. The X-ray at one year will be taken in order to determine the  
36 34 grade of degenerative joint changes. Time to define the presence of a delayed- or non-union  
37 35 will be at three or six months.[Figure 1-3]

1  
2  
3 1  
4 2 The primary outcome will be the Patient Rated Wrist Evaluation Score, of which the minimal  
5 3 clinically important difference is 11.5 points. The standard deviation of the PRWE is  
6 4 14.0.[21] Based on a difference of 11.5 points, the sample size of 27 patients per treatment  
7 5 group is calculated with a power (1- $\beta$ ) of 80 percent and a type I error ( $\alpha$ ) of 5 percent,  
8 6 allowing for 10 percent drop-out. In this study, we decided to include 45 patients per  
9 7 treatment group. To allow a 10 percent drop-out in this study, in total 100 patients will be  
10 8 included.

11 9 Data from the demographic data collection and the outcome parameters will be cleaned  
12 10 blindly from the treatment data. Data are presented as mean scores with 95% confidence  
13 11 intervals. The analysis of this study will be carried out according to the intention-to treat  
14 12 principle, i.e. the patients will remain in the group they will be randomly allocated to at  
15 13 baseline. Analysis of functional outcome will be assessed using repeated-measures analysis  
16 14 of variance (GLM 4) with the time as the within-group factor and the treatment as the  
17 15 between-group factor. Post-hoc analysis will be performed on the time of randomisation.  
18 16 Group comparisons at the different time points will be made only when the overall repeated-  
19 17 measures tests are statistically significant. All scores will be tested for normality using the  
20 18 Kolmogorov-Smirnov test. Parametric variables will be compared using the Student's t-test,  
21 19 while non-parametric and ordinal variables will be compared using the Mann-Whitney U  
22 20 statistic. Nominal variables will be compared across independent groups using the chi-  
23 21 squared test or Fisher's exact test. Homogeneity of variance will be assessed using  
24 22 Levene's test. Also, a multiple regression will be performed. SPSS statistical software  
25 23 (version 24.0) will be used for the analysis, in which two-tailed P value < 0.05 will be  
26 24 considered significant.

## 26 **Patient and public involvement**

27 27 Patients were not involved in the research process. Although, during the time span the study  
28 28 is carried out, participants receive an annually update on the progress of the study by a  
29 29 specially developed newsletter.



1  
2  
3  
4  
5  
6  
7  
8  
9  
10  
11  
12  
13  
14  
15  
16  
17  
18  
19  
20  
21  
22  
23  
24  
25  
26  
27  
28  
29  
30  
31  
32  
33  
34  
35  
36  
37  
38  
39  
40  
41  
42  
43  
44  
45  
46  
47  
48  
49  
50  
51  
52  
53  
54  
55  
56  
57  
58  
59  
60  

## 1 REFERENCES

1. **Meena S, Sharma P, Sambharia AK, Dawar A**, Fracture of Distal Radius: An overview. *J Family Medicine and Primary Care*, 2014; 3(4): 325-332.
2. **Cooney WP**, Management of Colles' fractures. *J Hand Surg Br*, 1989;14(2): 137–139.
3. **McQueen M, Caspers J**, Colles fracture: does the anatomical result affect the final function? *J Bone Joint Surg*, 1988; 70(4): 649–651.
4. **Cooney WP, James M.D, Dobyns J.H, Linscheid R.L**, Complications of Colles fractures. *J Bone Joint Surg Am*, 1980; 62(4): 613-619.
5. **Solgaard S**, Early displacement of distal radius fracture. *Acta Orthopedica Scandinavia*, 1986; 57(3): 229–231.
6. **Abbaszadegan H, Sivers KV, Jonsson U**, Late displacement of Colles'fractures. *Int Orthopedics*, 1988; 12(3): 197–199.
7. **Solgaard S**, Function after distal radius fracture. *Acta Orthop Scand*, 1988; 59(1): 39–42.
8. **McAuliffe TB, Hilliar KM, Coates CJ, Grange WJ**, Early mobilisation of Colles' fractures. *J Bone Joint Surg Br*, 1987; 69(5) :727-729.
9. **Christensen OM, Christiansen TG, Krasheninnikhoff M, Hanssen FF**, Length of immobilization after fractures of the distal radius. *Int Orthop*, 1995;19(1): 26-9.
10. **Vang Hansen F, Staunstrup H, Mikkelsen S**, A comparison of 3 and 5 weeks immobilisation for Older type 1 and 2 Colles' fractures. *J Hand Surg Br*, 1998; 23(3): 400-401.
11. **MacDermid JC, Turgeon T, Richards RS, Beadle M, Roth JH**, Patient rating of wrist pain and disability: a reliable and valid measurement tool. *J Orthop Trauma*, 1998; 12(8): 577–586.
12. **Gummesson C, Ward MM, Atroshi I**, The shortened disabilities of the arm, shoulder and hand questionnaire (QuickDASH): validity and reliability based on responses within the full-length DASH. *BMC Musculoskelet Disord*, 2006; 7-44.
13. **Aaronson NK, Muller M, Cohen PD, Essink-Bot ML, Fekkes M, Sanderman R, Sprangers MA, te Velde A, Verrips E**, Translation, validation, and norming of the Dutch language version of the SF-36 Health Survey in community and chronic disease. *J Clin Epidemiol*, 1998; 51(11): 1055-1068.
14. **Bentohami A, de Korte N, Sosef N, Goslings JC, Bijlsma T, Schep N**, Study protocol: non-displaced distal radial fractures in adult patients: three weeks vs. five weeks of cast immobilization: a randomized trial. *BMC Musculoskeletal Disorders*, 2014, 15:24.
15. **Bentohami A, van Delft EAK, Vermeulen J, Sosef NL, de Korte N, Bijlsma TS, Goslings JC, Schep NWL**, Non- or minimally displaced distal radial fractures in adult patients: three weeks versus five weeks of cast immobilization – a randomized controlled trial. *J Wrist Surgery*, 2018.
16. **Handol HHG, Madhok R**, Conservative interventions for treating distal radial fractures in adults. *Cochrane Database of Systematic Reviews*, 2003; (2):CD000314
17. **Bruder AM, Shields N, Dodd KJ, Hau R, Taylor NF**, A progressive exercise and structured advice program does not improve activity more than structured advice alone following a distal radial fracture: a multi-centre, randomised trial. *Journal of Physiotherapy*, 2016 ; 62:145-52

- 1  
2  
3 1 **18. Lidström A**, Fractures of the distal end of the radius: a clinical and statistical study  
4 2 of end results. *Acta Orthop Scand Suppl*, 195; 41:1–118.  
5 3 **19. AAOS**, The treatment of distal radius fractures, guideline and evidence report,  
6 4 December 5, 2009.  
7 5 **20. Greene W, Heckman JD**, The Clinical Measurement of Joint Motion. Rosemont, IL:  
8 6 American Academy of Orthopaedic Surgeons, 1994.  
9 7 **21. Walenkamp MM, de Muinck Keizer RJ, Goslings JC, Vos LM, Rosenwasser MP,**  
10 8 **Schep MW**, The minimum clinically important Difference of the Patient-rated Wrist  
11 9 Evaluation Score for Patients with distal radius fractures, *Clin Orthop Relat Res*.  
12 10 2015 473(10):3235-41  
13  
14  
15  
16  
17  
18  
19  
20  
21  
22  
23  
24  
25  
26  
27  
28  
29  
30  
31  
32  
33  
34  
35  
36  
37  
38  
39  
40  
41  
42  
43  
44  
45  
46  
47  
48  
49  
50  
51  
52  
53  
54  
55  
56  
57  
58  
59  
60

For peer review only

## AUTHORS CONTRIBUTIONS

|                           |                                                                                                              |
|---------------------------|--------------------------------------------------------------------------------------------------------------|
| <u>E.A.K. van Delft:</u>  | Study development, writing study protocol,<br>Clinical investigator in Amsterdam UMC, VU Medical Center      |
| <u>F.W. Bloemers:</u>     | Project leader, corrections of study protocol                                                                |
| <u>N.L. Sosef:</u>        | First clinical investigator in Spaarne Gasthuis                                                              |
| <u>Prof. H.J. Bonjer:</u> | Head of department of Surgery Amsterdam UMC, VU Medical Center<br>Approval of the study protocol             |
| <u>N.W.L. Schep:</u>      | Study development                                                                                            |
| <u>J. Vermeulen:</u>      | Initial first clinical investigator in Spaarne Gasthuis,<br>study development, Corrections of study protocol |

## LIST OF ABBREVIATIONS

|           |                                                                                                                                                                                                      |
|-----------|------------------------------------------------------------------------------------------------------------------------------------------------------------------------------------------------------|
| AAOS      | American Association of Orthopedic Surgeons                                                                                                                                                          |
| ABR       | ABR form, General Assessment and Registration form, is the application form that is required for submission to the accredited Ethics Committee (In Dutch, ABR = Algemene Beoordeling en Registratie) |
| AVG       | Algemene verordening gegevensbescherming (Dutch Data Protection Act)                                                                                                                                 |
| CRPS      | Complex regional pain syndrome                                                                                                                                                                       |
| DASH      | Disability of Arm, Shoulder and Hand                                                                                                                                                                 |
| ED        | Emergency Department                                                                                                                                                                                 |
| IC        | Informed Consent                                                                                                                                                                                     |
| METC      | Medical research ethics committee (MREC)                                                                                                                                                             |
| NTR       | Nederlands Trial Register                                                                                                                                                                            |
| PRWE      | Patient Rated Wrist Evaluation                                                                                                                                                                       |
| qDASH     | Quick Disability of Arm, Shoulder and Hand                                                                                                                                                           |
| QuickDASH | Quick Disability of Arm, Shoulder and Hand                                                                                                                                                           |
| SPSS      | Statistical Package for the Social Sciences                                                                                                                                                          |
| VAS       | Visual analog scale                                                                                                                                                                                  |
| VUmc      | Vrije Universiteit Medical Center Amsterdam                                                                                                                                                          |
| X-ray     | Radiography                                                                                                                                                                                          |

## FIGURE LEGENDS

|          |                                                                       |
|----------|-----------------------------------------------------------------------|
| Figure 1 | Inclusion procedure                                                   |
| Figure 2 | Control of alignment and randomisation procedure                      |
| Figure 3 | Follow-up scheme four versus six weeks of plaster cast immobilisation |

1  
2  
3 **1 Ethics approval and consent to participate:**

4 2 The study is submitted to the Medical Ethics Committee VU Medical Center Amsterdam and  
5 3 Regional Ethical Committee and will be carried out in compliance with the Declaration of  
6 4 Helsinki on Ethical principles for medical research involving human subjects. The Medical  
7 5 Ethics Committee VU Medical Center Amsterdam acts as central ethics committee for this  
8 6 trial (reference number: 2018.004/NL62861.029.17)  
9 7

10  
11  
12  
13  
14 **8 Consent for publication:**

15 9 All patients will provide informed consent before participation in the trial. The data will be  
16 10 coded by patient number. Research data will be stored in a database (IBM SPSS Statistics  
17 11 for Windows, Version 22.0. Armonk, NY: IBM Corp. Released 2013), and will be handled  
18 12 confidentially and anonymously.  
19 13

20  
21  
22  
23  
24 **14 Availability of data and materials:**

25 15 The data will be coded by patient number. Research data will be stored in a database (IBM  
26 16 SPSS Statistics for Windows, Version 22.0. Armonk, NY: IBM Corp. Released 2013), and will  
27 17 be handled confidentially and anonymously. Research data that can be traced to individual  
28 18 persons can only be viewed by authorized personnel. These persons are the members of the  
29 19 research team, members of the health care inspection, and members of the Medical Ethics  
30 20 Committee of the Amsterdam UMC, VU Medical Center Amsterdam. Review of the data may  
31 21 be necessary to ensure the reliability and quality of the research. The handling of personal  
32 22 data is in compliance with the Data Protection Act (in Dutch: Algemene verordening  
33 23 gegevensbescherming, AVG) and the privacy regulation of the Amsterdam UMC, VU Medical  
34 24 Center Amsterdam.  
35 25

36  
37  
38  
39  
40  
41  
42  
43 **26 Competing interests:**

44 27 The authors declare that they have no competing interests.  
45 28

46  
47  
48  
49  
50  
51  
52  
53 **29 Funding:**

54 30 No external funding was received for this study.  
55 31

56  
57  
58  
59  
60  
**32 Acknowledgements:**

33 Not applicable.

## Figure 1: Inclusion procedure



Inclusion procedure

227x59mm (300 x 300 DPI)



1  
2  
3  
4  
5  
6  
7  
8  
9  
10  
11  
12  
13  
14  
15  
16  
17  
18  
19  
20  
21  
22  
23  
24  
25  
26  
27  
28  
29  
30  
31  
32  
33  
34  
35  
36  
37  
38  
39  
40  
41  
42  
43  
44  
45  
46  
47  
48  
49  
50  
51  
52  
53  
54  
55  
56  
57  
58  
59  
60

**Figure 2:** Control of alignment and randomisation procedure

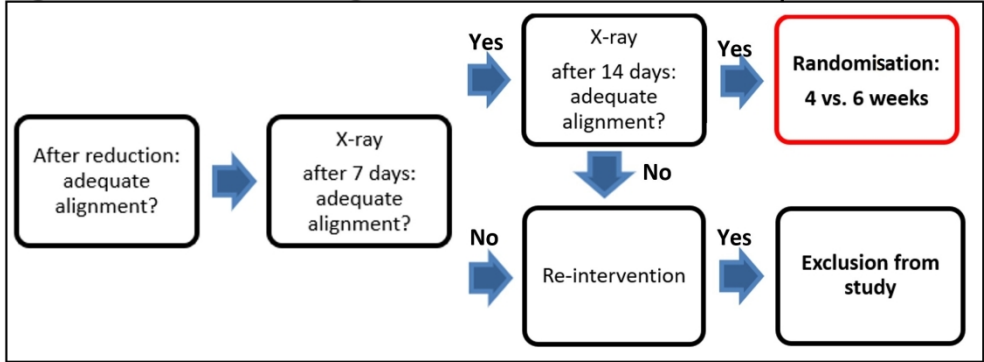

Control of alignment and randomisation procedure

198x86mm (300 x 300 DPI)

Figure 3: follow-up scheme four versus six weeks plaster cast immobilisation

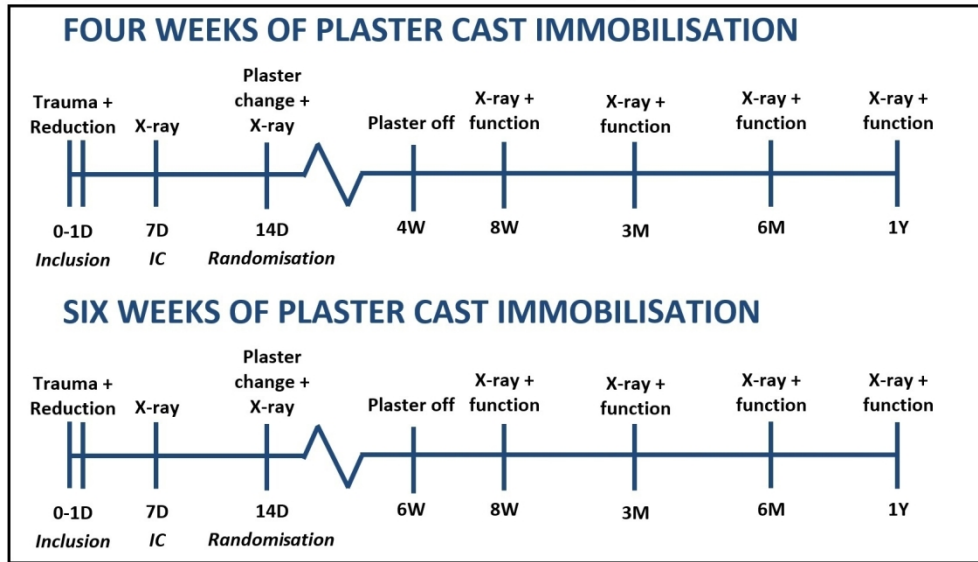

IC: informed consent. X-ray: control X-ray according to standard guidelines, assessment using Lidström score. Function: functional assessment using PRWE, QuickDASH, SF-36, range of motion, VAS scale

Follow-up scheme four versus six weeks of plaster cast immobilisation

145x97mm (300 x 300 DPI)

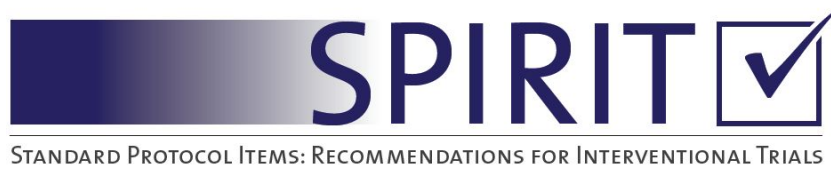

STANDARD PROTOCOL ITEMS: RECOMMENDATIONS FOR INTERVENTIONAL TRIALS

SPIRIT 2013 Checklist: Recommended items to address in a clinical trial protocol and related documents\*

| Section/item                      | Item No | Description                                                                                                                                                                                                                                                                              | Page/ line                                |
|-----------------------------------|---------|------------------------------------------------------------------------------------------------------------------------------------------------------------------------------------------------------------------------------------------------------------------------------------------|-------------------------------------------|
| <b>Administrative information</b> |         |                                                                                                                                                                                                                                                                                          |                                           |
| Title                             | 1       | Descriptive title identifying the study design, population, interventions, and, if applicable, trial acronym                                                                                                                                                                             | Page 1, Line 1-5                          |
| Trial registration                | 2a      | Trial identifier and registry name. If not yet registered, name of intended registry                                                                                                                                                                                                     | Page 1, Line 36-37                        |
|                                   | 2b      | All items from the World Health Organization Trial Registration Data Set                                                                                                                                                                                                                 | Page 1, Line 36-40                        |
| Protocol version                  | 3       | Date and version identifier                                                                                                                                                                                                                                                              | Page 1, Line 3                            |
| Funding                           | 4       | Sources and types of financial, material, and other support                                                                                                                                                                                                                              | Page 1, Line 39                           |
| Roles and responsibilities        | 5a      | Names, affiliations, and roles of protocol contributors                                                                                                                                                                                                                                  | Page 1, Line 8-35<br>Page 12, Line 1-10   |
|                                   | 5b      | Name and contact information for the trial sponsor                                                                                                                                                                                                                                       | Page 1, line 14-18,40                     |
|                                   | 5c      | Role of study sponsor and funders, if any, in study design; collection, management, analysis, and interpretation of data; writing of the report; and the decision to submit the report for publication, including whether they will have ultimate authority over any of these activities | Page 12, line 1-10<br>Page 13, line 29-37 |
|                                   | 5d      | Composition, roles, and responsibilities of the coordinating centre, steering committee, endpoint adjudication committee, data management team, and other individuals or groups overseeing the trial, if applicable (see Item 21a for data monitoring committee)                         | n.a.                                      |
| <b>Introduction</b>               |         |                                                                                                                                                                                                                                                                                          |                                           |
| Background and rationale          | 6a      | Description of research question and justification for undertaking the trial, including summary of relevant studies (published and unpublished) examining benefits and harms for each intervention                                                                                       | Page 4, Line 2-18                         |

|    |                                                           |    |                                                                   |
|----|-----------------------------------------------------------|----|-------------------------------------------------------------------|
| 1  |                                                           |    |                                                                   |
| 2  |                                                           | 6b | Explanation for choice of comparators                             |
| 3  |                                                           |    | Page 4, line 8-18                                                 |
| 4  | Objectives                                                | 7  | Specific objectives or hypotheses                                 |
| 5  |                                                           |    | Page 4, line 25-26                                                |
| 6  | Trial                                                     | 8  | Description of trial design including type of trial (eg, parallel |
| 7  | design                                                    |    | group, crossover, factorial, single group), allocation ratio,     |
| 8  |                                                           |    | and framework (eg, superiority, equivalence, noninferiority,      |
| 9  |                                                           |    | exploratory)                                                      |
| 10 |                                                           |    |                                                                   |
| 11 |                                                           |    |                                                                   |
| 12 | <b>Methods: Participants, interventions, and outcomes</b> |    |                                                                   |
| 13 |                                                           |    |                                                                   |
| 14 | Study                                                     | 9  | Description of study settings (eg, community clinic,              |
| 15 | setting                                                   |    | academic hospital) and list of countries where data will be       |
| 16 |                                                           |    | collected. Reference to where list of study sites can be          |
| 17 |                                                           |    | obtained                                                          |
| 18 |                                                           |    |                                                                   |
| 19 | Eligibility                                               | 10 | Inclusion and exclusion criteria for participants. If             |
| 20 | criteria                                                  |    | applicable, eligibility criteria for study centres and            |
| 21 |                                                           |    | individuals who will perform the interventions (eg,               |
| 22 |                                                           |    | surgeons, psychotherapists)                                       |
| 23 |                                                           |    |                                                                   |
| 24 |                                                           |    |                                                                   |
| 25 | Interventio                                               | 11 | Interventions for each group with sufficient detail to allow      |
| 26 | ns                                                        | a  | replication, including how and when they will be                  |
| 27 |                                                           |    | administered                                                      |
| 28 |                                                           |    |                                                                   |
| 29 |                                                           |    |                                                                   |
| 30 |                                                           | 11 | Criteria for discontinuing or modifying allocated                 |
| 31 |                                                           | b  | interventions for a given trial participant (eg, drug dose        |
| 32 |                                                           |    | change in response to harms, participant request, or              |
| 33 |                                                           |    | improving/worsening disease)                                      |
| 34 |                                                           |    |                                                                   |
| 35 |                                                           | 11 | Strategies to improve adherence to intervention protocols,        |
| 36 |                                                           | c  | and any procedures for monitoring adherence (eg, drug             |
| 37 |                                                           |    | tablet return, laboratory tests)                                  |
| 38 |                                                           |    |                                                                   |
| 39 |                                                           |    |                                                                   |
| 40 |                                                           | 11 | Relevant concomitant care and interventions that are              |
| 41 |                                                           | d  | permitted or prohibited during the trial                          |
| 42 |                                                           |    |                                                                   |
| 43 | Outcomes                                                  | 12 | Primary, secondary, and other outcomes, including the             |
| 44 |                                                           |    | specific measurement variable (eg, systolic blood                 |
| 45 |                                                           |    | pressure), analysis metric (eg, change from baseline, final       |
| 46 |                                                           |    | value, time to event), method of aggregation (eg, median,         |
| 47 |                                                           |    | proportion), and time point for each outcome. Explanation         |
| 48 |                                                           |    | of the clinical relevance of chosen efficacy and harm             |
| 49 |                                                           |    | outcomes is strongly recommended                                  |
| 50 |                                                           |    |                                                                   |
| 51 |                                                           |    |                                                                   |
| 52 | Participant                                               | 13 | Time schedule of enrolment, interventions (including any          |
| 53 | timeline                                                  |    | run-ins and washouts), assessments, and visits for                |
| 54 |                                                           |    | participants. A schematic diagram is highly recommended           |
| 55 |                                                           |    | (see Figure)                                                      |
| 56 |                                                           |    |                                                                   |
| 57 |                                                           |    |                                                                   |
| 58 |                                                           |    |                                                                   |
| 59 |                                                           |    |                                                                   |
| 60 |                                                           |    |                                                                   |

|   |           |    |                                                                                                                                                                                       |                  |
|---|-----------|----|---------------------------------------------------------------------------------------------------------------------------------------------------------------------------------------|------------------|
| 1 |           |    |                                                                                                                                                                                       |                  |
| 2 | Sample    | 14 | Estimated number of participants needed to achieve study objectives and how it was determined, including clinical and statistical assumptions supporting any sample size calculations | Page 8, line 2-8 |
| 3 | size      |    |                                                                                                                                                                                       |                  |
| 4 |           |    |                                                                                                                                                                                       |                  |
| 5 |           |    |                                                                                                                                                                                       |                  |
| 6 |           |    |                                                                                                                                                                                       |                  |
| 7 | Recruitme | 15 | Strategies for achieving adequate participant enrolment to reach target sample size                                                                                                   | n.a.             |
| 8 | nt        |    |                                                                                                                                                                                       |                  |
| 9 |           |    |                                                                                                                                                                                       |                  |

### Methods: Assignment of interventions (for controlled trials)

#### Allocation:

|    |           |    |                                                                                                                                                                                                                                                                                                                                                          |                   |
|----|-----------|----|----------------------------------------------------------------------------------------------------------------------------------------------------------------------------------------------------------------------------------------------------------------------------------------------------------------------------------------------------------|-------------------|
| 14 | Sequen    | 16 | Method of generating the allocation sequence (eg, computer-generated random numbers), and list of any factors for stratification. To reduce predictability of a random sequence, details of any planned restriction (eg, blocking) should be provided in a separate document that is unavailable to those who enrol participants or assign interventions | Page 6, line 4-11 |
| 15 | ce        | a  |                                                                                                                                                                                                                                                                                                                                                          |                   |
| 16 | generati  |    |                                                                                                                                                                                                                                                                                                                                                          |                   |
| 17 | on        |    |                                                                                                                                                                                                                                                                                                                                                          |                   |
| 18 |           |    |                                                                                                                                                                                                                                                                                                                                                          |                   |
| 19 |           |    |                                                                                                                                                                                                                                                                                                                                                          |                   |
| 20 |           |    |                                                                                                                                                                                                                                                                                                                                                          |                   |
| 21 |           |    |                                                                                                                                                                                                                                                                                                                                                          |                   |
| 22 |           |    |                                                                                                                                                                                                                                                                                                                                                          |                   |
| 23 |           |    |                                                                                                                                                                                                                                                                                                                                                          |                   |
| 24 | Allocatio | 16 | Mechanism of implementing the allocation sequence (eg, central telephone; sequentially numbered, opaque, sealed envelopes), describing any steps to conceal the sequence until interventions are assigned                                                                                                                                                | Page 6, line 4-11 |
| 25 | n         | b  |                                                                                                                                                                                                                                                                                                                                                          |                   |
| 26 | conceal   |    |                                                                                                                                                                                                                                                                                                                                                          |                   |
| 27 | ment      |    |                                                                                                                                                                                                                                                                                                                                                          |                   |
| 28 | mechani   |    |                                                                                                                                                                                                                                                                                                                                                          |                   |
| 29 | sm        |    |                                                                                                                                                                                                                                                                                                                                                          |                   |
| 30 |           |    |                                                                                                                                                                                                                                                                                                                                                          |                   |
| 31 |           |    |                                                                                                                                                                                                                                                                                                                                                          |                   |
| 32 | Implem    | 16 | Who will generate the allocation sequence, who will enrol participants, and who will assign participants to interventions                                                                                                                                                                                                                                | Page 6, line 5    |
| 33 | entation  | c  |                                                                                                                                                                                                                                                                                                                                                          |                   |
| 34 |           |    |                                                                                                                                                                                                                                                                                                                                                          |                   |
| 35 |           |    |                                                                                                                                                                                                                                                                                                                                                          |                   |
| 36 |           |    |                                                                                                                                                                                                                                                                                                                                                          |                   |
| 37 | Blinding  | 17 | Who will be blinded after assignment to interventions (eg, trial participants, care providers, outcome assessors, data analysts), and how                                                                                                                                                                                                                | Page 8, line 9-10 |
| 38 | (masking) | a  |                                                                                                                                                                                                                                                                                                                                                          |                   |
| 39 |           |    |                                                                                                                                                                                                                                                                                                                                                          |                   |
| 40 |           |    |                                                                                                                                                                                                                                                                                                                                                          |                   |
| 41 |           | 17 | If blinded, circumstances under which unblinding is permissible, and procedure for revealing a participant's allocated intervention during the trial                                                                                                                                                                                                     | n.a.              |
| 42 |           | b  |                                                                                                                                                                                                                                                                                                                                                          |                   |
| 43 |           |    |                                                                                                                                                                                                                                                                                                                                                          |                   |
| 44 |           |    |                                                                                                                                                                                                                                                                                                                                                          |                   |

### Methods: Data collection, management, and analysis

|    |            |    |                                                                                                                                                                                                                                                                                                                                                                                                              |                   |
|----|------------|----|--------------------------------------------------------------------------------------------------------------------------------------------------------------------------------------------------------------------------------------------------------------------------------------------------------------------------------------------------------------------------------------------------------------|-------------------|
| 47 | Data       | 18 | Plans for assessment and collection of outcome, baseline, and other trial data, including any related processes to promote data quality (eg, duplicate measurements, training of assessors) and a description of study instruments (eg, questionnaires, laboratory tests) along with their reliability and validity, if known. Reference to where data collection forms can be found, if not in the protocol | Page 8, line 9-24 |
| 48 | collection | a  |                                                                                                                                                                                                                                                                                                                                                                                                              |                   |
| 49 | methods    |    |                                                                                                                                                                                                                                                                                                                                                                                                              |                   |
| 50 |            |    |                                                                                                                                                                                                                                                                                                                                                                                                              |                   |
| 51 |            |    |                                                                                                                                                                                                                                                                                                                                                                                                              |                   |
| 52 |            |    |                                                                                                                                                                                                                                                                                                                                                                                                              |                   |
| 53 |            |    |                                                                                                                                                                                                                                                                                                                                                                                                              |                   |
| 54 |            |    |                                                                                                                                                                                                                                                                                                                                                                                                              |                   |
| 55 |            |    |                                                                                                                                                                                                                                                                                                                                                                                                              |                   |
| 56 |            |    |                                                                                                                                                                                                                                                                                                                                                                                                              |                   |
| 57 |            |    |                                                                                                                                                                                                                                                                                                                                                                                                              |                   |
| 58 |            |    |                                                                                                                                                                                                                                                                                                                                                                                                              |                   |
| 59 |            |    |                                                                                                                                                                                                                                                                                                                                                                                                              |                   |
| 60 |            |    |                                                                                                                                                                                                                                                                                                                                                                                                              |                   |

|    |             |    |                                                                |
|----|-------------|----|----------------------------------------------------------------|
| 1  |             |    |                                                                |
| 2  |             | 18 | Plans to promote participant retention and complete follow-    |
| 3  |             | b  | up, including list of any outcome data to be collected for     |
| 4  |             |    | participants who discontinue or deviate from intervention      |
| 5  |             |    | protocols                                                      |
| 6  |             |    |                                                                |
| 7  | Data        | 19 | Plans for data entry, coding, security, and storage,           |
| 8  | manageme    |    | including any related processes to promote data quality        |
| 9  | nt          |    | (eg, double data entry; range checks for data values).         |
| 10 |             |    | Reference to where details of data management                  |
| 11 |             |    | procedures can be found, if not in the protocol                |
| 12 |             |    |                                                                |
| 13 |             |    |                                                                |
| 14 | Statistical | 20 | Statistical methods for analysing primary and secondary        |
| 15 | methods     | a  | outcomes. Reference to where other details of the              |
| 16 |             |    | statistical analysis plan can be found, if not in the protocol |
| 17 |             |    |                                                                |
| 18 |             |    |                                                                |
| 19 |             | 20 | Methods for any additional analyses (eg, subgroup and          |
| 20 |             | b  | adjusted analyses)                                             |
| 21 |             |    |                                                                |
| 22 |             | 20 | Definition of analysis population relating to protocol non-    |
| 23 |             | c  | adherence (eg, as randomised analysis), and any statistical    |
| 24 |             |    | methods to handle missing data (eg, multiple imputation)       |
| 25 |             |    |                                                                |

### Methods: Monitoring

|    |            |    |                                                                 |
|----|------------|----|-----------------------------------------------------------------|
| 26 |            |    |                                                                 |
| 27 |            |    |                                                                 |
| 28 | Data       | 21 | Composition of data monitoring committee (DMC);                 |
| 29 | monitoring | a  | summary of its role and reporting structure; statement of       |
| 30 |            |    | whether it is independent from the sponsor and competing        |
| 31 |            |    | interests; and reference to where further details about its     |
| 32 |            |    | charter can be found, if not in the protocol. Alternatively, an |
| 33 |            |    | explanation of why a DMC is not needed                          |
| 34 |            |    |                                                                 |
| 35 |            |    |                                                                 |
| 36 |            | 21 | Description of any interim analyses and stopping                |
| 37 |            | b  | guidelines, including who will have access to these interim     |
| 38 |            |    | results and make the final decision to terminate the trial      |
| 39 |            |    |                                                                 |
| 40 |            |    |                                                                 |
| 41 | Harms      | 22 | Plans for collecting, assessing, reporting, and managing        |
| 42 |            |    | solicited and spontaneously reported adverse events and         |
| 43 |            |    | other unintended effects of trial interventions or trial        |
| 44 |            |    | conduct                                                         |
| 45 |            |    |                                                                 |
| 46 |            |    |                                                                 |
| 47 | Auditing   | 23 | Frequency and procedures for auditing trial conduct, if any,    |
| 48 |            |    | and whether the process will be independent from                |
| 49 |            |    | investigators and the sponsor                                   |
| 50 |            |    |                                                                 |

### Ethics and dissemination

|    |          |    |                                                           |
|----|----------|----|-----------------------------------------------------------|
| 51 |          |    |                                                           |
| 52 |          |    |                                                           |
| 53 | Research | 24 | Plans for seeking research ethics committee/institutional |
| 54 | ethics   |    | review board (REC/IRB) approval                           |
| 55 | approval |    |                                                           |
| 56 |          |    |                                                           |
| 57 |          |    |                                                           |
| 58 |          |    |                                                           |
| 59 |          |    |                                                           |
| 60 |          |    |                                                           |

|    |                 |    |                                                                 |                       |
|----|-----------------|----|-----------------------------------------------------------------|-----------------------|
| 1  |                 |    |                                                                 |                       |
| 2  | Protocol        | 25 | Plans for communicating important protocol modifications        | n.a.                  |
| 3  | amendmen        |    | (eg, changes to eligibility criteria, outcomes, analyses) to    | available in protocol |
| 4  | ts              |    | relevant parties (eg, investigators, REC/IRBs, trial            |                       |
| 5  |                 |    | participants, trial registries, journals, regulators)           |                       |
| 6  |                 |    |                                                                 |                       |
| 7  | Consent or      | 26 | Who will obtain informed consent or assent from potential       | Page 5, line 17       |
| 8  | assent          | a  | trial participants or authorised surrogates, and how (see       | Page 6, line 5-6      |
| 9  |                 |    | Item 32)                                                        |                       |
| 10 |                 |    |                                                                 |                       |
| 11 |                 |    |                                                                 |                       |
| 12 |                 | 26 | Additional consent provisions for collection and use of         | n.a.                  |
| 13 |                 | b  | participant data and biological specimens in ancillary          |                       |
| 14 |                 |    | studies, if applicable                                          |                       |
| 15 |                 |    |                                                                 |                       |
| 16 | Confidenti      | 27 | How personal information about potential and enrolled           | available in protocol |
| 17 | ality           |    | participants will be collected, shared, and maintained in       |                       |
| 18 |                 |    | order to protect confidentiality before, during, and after the  |                       |
| 19 |                 |    | trial                                                           |                       |
| 20 |                 |    |                                                                 |                       |
| 21 |                 |    |                                                                 |                       |
| 22 | Declaratio      | 28 | Financial and other competing interests for principal           | Page 13, line 26-30   |
| 23 | n of            |    | investigators for the overall trial and each study site         |                       |
| 24 | interests       |    |                                                                 |                       |
| 25 |                 |    |                                                                 |                       |
| 26 | Access to       | 29 | Statement of who will have access to the final trial dataset,   | available in protocol |
| 27 | data            |    | and disclosure of contractual agreements that limit such        |                       |
| 28 |                 |    | access for investigators                                        |                       |
| 29 |                 |    |                                                                 |                       |
| 30 |                 |    |                                                                 |                       |
| 31 | Ancillary       | 30 | Provisions, if any, for ancillary and post-trial care, and for  | n.a.                  |
| 32 | and post-       |    | compensation to those who suffer harm from trial                |                       |
| 33 | trial care      |    | participation                                                   |                       |
| 34 |                 |    |                                                                 |                       |
| 35 | Disseminat      | 31 | Plans for investigators and sponsor to communicate trial        | Page 8, line 27-29    |
| 36 | ion policy      | a  | results to participants, healthcare professionals, the public,  |                       |
| 37 |                 |    | and other relevant groups (eg, via publication, reporting in    |                       |
| 38 |                 |    | results databases, or other data sharing arrangements),         |                       |
| 39 |                 |    | including any publication restrictions                          |                       |
| 40 |                 |    |                                                                 |                       |
| 41 |                 |    |                                                                 |                       |
| 42 |                 | 31 | Authorship eligibility guidelines and any intended use of       | Page 12, line 1-10    |
| 43 |                 | b  | professional writers                                            |                       |
| 44 |                 |    |                                                                 |                       |
| 45 |                 | 31 | Plans, if any, for granting public access to the full protocol, | n.a.                  |
| 46 |                 | c  | participant-level dataset, and statistical code                 |                       |
| 47 |                 |    |                                                                 |                       |
| 48 |                 |    |                                                                 |                       |
| 49 | <b>Appendic</b> |    |                                                                 |                       |
| 50 | <b>es</b>       |    |                                                                 |                       |
| 51 |                 |    |                                                                 |                       |
| 52 | Informed        | 32 | Model consent form and other related documentation given        | added                 |
| 53 | consent         |    | to participants and authorised surrogates                       |                       |
| 54 | materials       |    |                                                                 |                       |
| 55 |                 |    |                                                                 |                       |
| 56 |                 |    |                                                                 |                       |
| 57 |                 |    |                                                                 |                       |
| 58 |                 |    |                                                                 |                       |
| 59 |                 |    |                                                                 |                       |
| 60 |                 |    |                                                                 |                       |

1  
2 Biological 33 Plans for collection, laboratory evaluation, and storage of n.a.  
3 specimens biological specimens for genetic or molecular analysis in  
4 the current trial and for future use in ancillary studies, if  
5 applicable  
6

---

7 \*It is strongly recommended that this checklist be read in conjunction with the SPIRIT 2013  
8 Explanation & Elaboration for important clarification on the items. Amendments to the  
9 protocol should be tracked and dated. The SPIRIT checklist is copyrighted by the SPIRIT  
10 Group under the Creative Commons "[Attribution-NonCommercial-NoDerivs 3.0 Unported](#)"  
11 license.  
12  
13  
14  
15  
16  
17  
18  
19  
20  
21  
22  
23  
24  
25  
26  
27  
28  
29  
30  
31  
32  
33  
34  
35  
36  
37  
38  
39  
40  
41  
42  
43  
44  
45  
46  
47  
48  
49  
50  
51  
52  
53  
54  
55  
56  
57  
58  
59  
60





CONSORT 2010 checklist of information to include when reporting a randomised trial\*

| Section/Topic                    | Item No | Checklist item                                                                                                                                                                              | Reported on page No |
|----------------------------------|---------|---------------------------------------------------------------------------------------------------------------------------------------------------------------------------------------------|---------------------|
| <b>Title and abstract</b>        |         |                                                                                                                                                                                             |                     |
|                                  | 1a      | Identification as a randomised trial in the title                                                                                                                                           | 1                   |
|                                  | 1b      | Structured summary of trial design, methods, results, and conclusions (for specific guidance see CONSORT for abstracts)                                                                     | 1                   |
| <b>Introduction</b>              |         |                                                                                                                                                                                             |                     |
| Background and objectives        | 2a      | Scientific background and explanation of rationale                                                                                                                                          | 3                   |
|                                  | 2b      | Specific objectives or hypotheses                                                                                                                                                           | 3                   |
| <b>Methods</b>                   |         |                                                                                                                                                                                             |                     |
| Trial design                     | 3a      | Description of trial design (such as parallel, factorial) including allocation ratio                                                                                                        | 4                   |
|                                  | 3b      | Important changes to methods after trial commencement (such as eligibility criteria), with reasons                                                                                          | n.a.                |
| Participants                     | 4a      | Eligibility criteria for participants                                                                                                                                                       | 4                   |
|                                  | 4b      | Settings and locations where the data were collected                                                                                                                                        | 4/5                 |
| Interventions                    | 5       | The interventions for each group with sufficient details to allow replication, including how and when they were actually administered                                                       | 4-7                 |
| Outcomes                         | 6a      | Completely defined pre-specified primary and secondary outcome measures, including how and when they were assessed                                                                          | 5                   |
|                                  | 6b      | Any changes to trial outcomes after the trial commenced, with reasons                                                                                                                       | n.a.                |
| Sample size                      | 7a      | How sample size was determined                                                                                                                                                              | 7                   |
|                                  | 7b      | When applicable, explanation of any interim analyses and stopping guidelines                                                                                                                | n.a.                |
| <b>Randomisation:</b>            |         |                                                                                                                                                                                             |                     |
| Sequence generation              | 8a      | Method used to generate the random allocation sequence                                                                                                                                      | 5                   |
|                                  | 8b      | Type of randomisation; details of any restriction (such as blocking and block size)                                                                                                         | 5                   |
| Allocation concealment mechanism | 9       | Mechanism used to implement the random allocation sequence (such as sequentially numbered containers), describing any steps taken to conceal the sequence until interventions were assigned | 5                   |
| Implementation                   | 10      | Who generated the random allocation sequence, who enrolled participants, and who assigned participants to interventions                                                                     | 5.6                 |
| Blinding                         | 11a     | If done, who was blinded after assignment to interventions (for example, participants, care providers, those                                                                                | 6                   |

|                                                      |     |                                                                                                                                                   |                   |
|------------------------------------------------------|-----|---------------------------------------------------------------------------------------------------------------------------------------------------|-------------------|
|                                                      |     | assessing outcomes) and how                                                                                                                       |                   |
|                                                      | 11b | If relevant, description of the similarity of interventions                                                                                       | n.a.              |
| Statistical methods                                  | 12a | Statistical methods used to compare groups for primary and secondary outcomes                                                                     | 7,8               |
|                                                      | 12b | Methods for additional analyses, such as subgroup analyses and adjusted analyses                                                                  | 8                 |
| <b>Results</b>                                       |     |                                                                                                                                                   |                   |
| Participant flow (a diagram is strongly recommended) | 13a | For each group, the numbers of participants who were randomly assigned, received intended treatment, and were analysed for the primary outcome    | 7                 |
|                                                      | 13b | For each group, losses and exclusions after randomisation, together with reasons                                                                  | 7,8               |
| Recruitment                                          | 14a | Dates defining the periods of recruitment and follow-up                                                                                           | 6                 |
|                                                      | 14b | Why the trial ended or was stopped                                                                                                                | n.a.              |
| Baseline data                                        | 15  | A table showing baseline demographic and clinical characteristics for each group                                                                  | study             |
| Numbers analysed                                     | 16  | For each group, number of participants (denominator) included in each analysis and whether the analysis was by original assigned groups           | protocol<br>n.a.  |
| Outcomes and estimation                              | 17a | For each primary and secondary outcome, results for each group, and the estimated effect size and its precision (such as 95% confidence interval) | study<br>protocol |
|                                                      | 17b | For binary outcomes, presentation of both absolute and relative effect sizes is recommended                                                       | n.a.              |
| Ancillary analyses                                   | 18  | Results of any other analyses performed, including subgroup analyses and adjusted analyses, distinguishing pre-specified from exploratory         | study<br>protocol |
| Harms                                                | 19  | All important harms or unintended effects in each group (for specific guidance see CONSORT for harms)                                             | n.a.              |
| <b>Discussion</b>                                    |     |                                                                                                                                                   |                   |
| Limitations                                          | 20  | Trial limitations, addressing sources of potential bias, imprecision, and, if relevant, multiplicity of analyses                                  | study<br>protocol |
| Generalisability                                     | 21  | Generalisability (external validity, applicability) of the trial findings                                                                         |                   |
| Interpretation                                       | 22  | Interpretation consistent with results, balancing benefits and harms, and considering other relevant evidence                                     |                   |
| <b>Other information</b>                             |     |                                                                                                                                                   |                   |
| Registration                                         | 23  | Registration number and name of trial registry                                                                                                    | 1                 |
| Protocol                                             | 24  | Where the full trial protocol can be accessed, if available                                                                                       | 1                 |
| Funding                                              | 25  | Sources of funding and other support (such as supply of drugs), role of funders                                                                   | 12                |

\*We strongly recommend reading this statement in conjunction with the CONSORT 2010 Explanation and Elaboration for important clarifications on all the items. If relevant, we also recommend reading CONSORT extensions for cluster randomised trials, non-inferiority and equivalence trials, non-pharmacological treatments, herbal interventions, and pragmatic trials. Additional extensions are forthcoming: for those and for up to date references relevant to this checklist, see [www.consort-statement.org](http://www.consort-statement.org).
